# Supplementary material
Source: Preprints.org preprint supplement (doi:10.20944/preprints201908.0149.v2)
Supplement: Supplementary file 1 [file supplementary]

# SUPPORTING INFORMATION

## **Metabolic Trajectories Following Contrasting Prudent and Western Diets from Food Provisions: Identifying Robust Biomarkers of Short-term Changes in Habitual Diet**

Nadine Wellington,<sup>1</sup> Meera Shanmuganathan,<sup>1</sup> Russell J. de Souza,<sup>2,3</sup> Michael Zulyniak,<sup>2,4</sup> Sandi Azab,<sup>1</sup> Jonathon Bloomfield,<sup>1</sup> Alicia Mell,<sup>1</sup> Ritchie Ly,<sup>1</sup> Dipika Desai,<sup>2</sup> Sonia S. Anand,<sup>2,3</sup> and Philip Britz-McKibbin<sup>1</sup>

<sup>1</sup> *Department of Chemical and Chemical Biology, McMaster University, Hamilton, ON, Canada*

<sup>2</sup> *Department of Medicine, McMaster University, Hamilton, ON, Canada*

<sup>3</sup> *Department of Clinical Epidemiology and Biostatistics, McMaster University, Hamilton, ON Canada*

<sup>4</sup> *School of Food Science and Nutrition, University of Leeds, Leeds, United Kingdom*

\* Corresponding author: Philip Britz-McKibbin, [britz@mcmaster.ca](mailto:britz@mcmaster.ca)

**Tables S1-S2; Figures S1-S14**

**Table S1.** Baseline group characteristics of a cohort of healthy participants ( $n=42$ ) recruited in a two-arm parallel randomized clinical trial to compare the effects of a contrasting diet over 2 weeks (Western or Prudent) from food provisions reflecting changes in habitual dietary patterns.

| Variable                                    | Prudent assigned<br>W-P, $n=24$ | Western assigned<br>P-W, $n=18$ | Significance/comments <sup>b</sup>                                               |
|---------------------------------------------|---------------------------------|---------------------------------|----------------------------------------------------------------------------------|
| Sex (n; %)                                  | --                              | --                              | More females than males recruited in each arm                                    |
| F                                           | 66%, $n=16$                     | 61%, $n=11$                     |                                                                                  |
| M                                           | 33%, $n=8$                      | 39%, $n=7$                      |                                                                                  |
| Age (mean)                                  | (50 ± 18)                       | (43 ± 20)                       | $p = 0.282$ ; Wide disparity in age with no differences between arms             |
| < 50 y                                      | (29 ± 9, $n=9$ )                | (28 ± 10, $n=10$ )              |                                                                                  |
| > 50 y                                      | (62 ± 7, $n=15$ )               | (63 ± 8, $n=8$ )                |                                                                                  |
| BMI (mean)                                  | (28 ± 6)                        | (26 ± 6)                        | $p = 0.164$ ; Wide disparity in body composition and no differences between arms |
| Lean (19-24.9 kg/m <sup>2</sup> )           | (23 ± 2, $n=7$ )                | (22 ± 2, $n=11$ )               |                                                                                  |
| Overweight/obese (25-44 kg/m <sup>2</sup> ) | (30 ± 5, $n=17$ )               | (31 ± 5, $n=7$ )                |                                                                                  |
| Habitual baseline diet index <sup>a</sup>   | --                              | --                              | $p = 0.0037$ ; Greater western habitual dietary patterns in Prudent assigned arm |
| Prudent diet score                          | (0.42 ± 0.93)                   | (0.92 ± 0.68)                   |                                                                                  |
| Western diet score                          | (3.4 ± 0.9)                     | (0.70 ± 1.31)                   |                                                                                  |
| Average caloric intake (kcal)               | (1985 ± 560)                    | (1895 ± 640)                    | $p = 0.629$ ; No significant difference in caloric intake                        |
| Average fiber intake (/2000 kcal)           | (21.3 ± 6.3)                    | (26.6 ± 8.5)                    | $p = 0.018$ ; Higher intake of fiber in western assigned arm                     |
| Average poly:sat fatty acid (ratio)         | (0.44 ± 0.16)                   | (0.58 ± 0.16)                   | $p = 0.0067$ ; Higher poly:sat intake in western assigned arm                    |
| Average energy from sat. fat (%)            | (11.9 ± 3.2)                    | (9.8 ± 2.0)                     | $p = 0.015$ ; Higher sat. fat intake in prudent assigned arm                     |
| Urinary Na/K (ratio)                        | (1.31 ± 0.72)                   | (0.80 ± 0.55)                   | $p = 0.016$ ; Higher Na/K intake in prudent assigned arm                         |
| Fasting glucose (mM)                        | (5.1 ± 1.0)                     | (4.9 ± 0.4)                     | $p = 0.585$ ; No significant difference in fasting glucose                       |
| LDL cholesterol (mM)                        | (3.1 ± 1.0)                     | (2.8 ± 0.9)                     | $p = 0.309$ ; No significant difference in LDL                                   |
| HDL cholesterol (mM)                        | (1.55 ± 0.42)                   | (1.46 ± 0.44)                   | $p = 0.693$ ; No significant difference in HDL                                   |
| Total cholesterol (mM)                      | (5.2 ± 1.3)                     | (5.0 ± 1.0)                     | $p = 0.621$ ; No significant difference in cholesterol                           |
| Triglycerides (mM)                          | (0.63 ± 0.18)                   | (0.61 ± 0.18)                   | $p = 0.319$ ; No significant difference in triglycerides                         |
| ApoB/ApoA1 ratio                            | (0.60 ± 0.18)                   | (0.64 ± 0.19)                   | $p = 0.430$ ; No significant difference in ApoB/ApoA1                            |
| CRP (mg/L)                                  | (3.9 ± 7.0)                     | (2.3 ± 4.0)                     | $p = 0.405$ ; No significant difference in CRP                                   |
| IL-8 (ng/L)                                 | (9.1 ± 6.5)                     | (6.8 ± 2.1)                     | $p = 0.159$ ; No significant difference in IL-8                                  |
| Average systolic BP (mmHg)                  | (121 ± 18)                      | (114 ± 17)                      | $p = 0.461$ ; No significant difference in systolic BP                           |
| Average diastolic BP (mmHg)                 | (78 ± 11)                       | (74 ± 10)                       | $p = 0.372$ ; No significant difference in diastolic BP                          |

<sup>a</sup> Self-reported diet quality score at baseline was used as a single aggregate index to categorize dietary patterns as predominately Prudent or Western in terms of average daily intake of total fiber, fruit & vegetables, potassium, polyunsaturated/saturated fatty acid ratio and % saturated fatty acids with a maximum of 5 points to the scale.

<sup>b</sup> There were no significant differences ( $p < 0.05$ ) in classic serum/plasma biomarkers of CVD risk at baseline, as well as following 2-week dietary intervention between treatment arm among subjects in this study.

**Table S2.** Summary of authenticated and reliably measured urinary and plasma metabolites detected in the majority of DIGEST participants that were annotated based on their accurate mass ( $m/z$ ), relative migration time (RMT), ionization mode ( $p = \text{ESI}^+$ ,  $n = \text{ESI}^-$ ), most likely molecular formula, compound name, confidence level for identification, and technical precision from QC measurements. Overall, there were 70 and 50 polar/ionic metabolites measured in urine (8 electrolytes measured by CE-UV not listed here), and plasma samples by MSI-CE-MS (including recovery standards not listed here), respectively, as well as 26 (total) plasma fatty acids analyzed by GC-MS.

| <i>Biofluid</i> | <i>m/z:RMT:polarity</i> | <i>Molecular formula<sup>a</sup></i>                         | <i>Monoisotopic mass</i> | <i><math>\Delta m</math> (ppm)</i> | <i>Compound ID</i>             | <i>HMDB ID</i> | <i>Level of Confidence<sup>b</sup></i> | <i>%CV<sup>c</sup></i> |
|-----------------|-------------------------|--------------------------------------------------------------|--------------------------|------------------------------------|--------------------------------|----------------|----------------------------------------|------------------------|
| Urine           | 76.0757 : 0.546:+       | C <sub>3</sub> H <sub>9</sub> NO                             | 76.0757                  | 0.0                                | Trimethylamine <i>N</i> -oxide | HMDB00925      | 2                                      | 9.86                   |
| Urine           | 104.0706 : 0.667:+      | C <sub>4</sub> H <sub>9</sub> NO <sub>2</sub>                | 104.0706                 | 0.0                                | $\gamma$ -Aminobutyric acid    | HMDB00112      | 2                                      | 39.69                  |
| Urine           | 104.0706 : 0.928:+      | C <sub>4</sub> H <sub>9</sub> NO <sub>2</sub>                | 104.0706                 | 0.0                                | Dimethylglycine                | HMDB0000092    | 2                                      | 33.80                  |
| Urine           | 104.1075 : 0.569:+      | C <sub>5</sub> H <sub>14</sub> NO                            | 104.1075                 | 0.0                                | Choline                        | HMDB0000097    | 2                                      | 12.54                  |
| Urine           | 106.0499 : 0.844:+      | C <sub>3</sub> H <sub>7</sub> NO <sub>3</sub>                | 106.0498                 | 0.9                                | Serine                         | HMDB0000187    | 2                                      | 11.45                  |
| Urine           | 118.0863 : 0.958:+      | C <sub>5</sub> H <sub>11</sub> NO <sub>2</sub>               | 118.0862                 | 0.8                                | Betaine                        | HMDB0000043    | 2                                      | 12.35                  |
| Urine           | 133.0611 : 0.885:+      | C <sub>4</sub> H <sub>8</sub> N <sub>2</sub> O <sub>3</sub>  | 133.0607                 | 3.0                                | Asparagine                     | HMDB0000168    | 2                                      | 12.87                  |
| Urine           | 137.0460 : 1.067:+      | C <sub>5</sub> H <sub>4</sub> N <sub>4</sub> O               | 137.0458                 | 1.5                                | Hypoxanthine                   | HMDB0000157    | 2                                      | 6.33                   |
| Urine           | 137.0706 : 0.613:+      | C <sub>7</sub> H <sub>8</sub> N <sub>2</sub> O               | 137.0709                 | 2.2                                | Methylnicotinamide             | HMDB0003152    | 2                                      | 16.81                  |
| Urine           | 138.0550 : 0.891:+      | C <sub>7</sub> H <sub>7</sub> NO <sub>2</sub>                | 138.0549                 | 0.7                                | <i>p</i> -Aminobenzoic acid    | HMDB0001392    | 2                                      | 13.31                  |
| Urine           | 141.0660 : 0.690:+      | C <sub>6</sub> H <sub>8</sub> N <sub>2</sub> O <sub>2</sub>  | 141.0658                 | 1.4                                | Imidazole propionic acid       | HMDB0002820    | 2                                      | 8.23                   |
| Urine           | 144.1020 : 0.967:+      | C <sub>7</sub> H <sub>13</sub> NO <sub>2</sub>               | 144.1019                 | 0.7                                | Proline betaine                | HMDB0004827    | 1                                      | 12.88                  |
| Urine           | 146.0812 : 1.183:+      | C <sub>6</sub> H <sub>11</sub> NO <sub>3</sub>               | 146.0811                 | 0.7                                | Hydroxyproline                 | HMDB0029426    | 2                                      | 9.13                   |
| Urine           | 147.0764 : 0.911:+      | C <sub>5</sub> H <sub>10</sub> N <sub>2</sub> O <sub>3</sub> | 147.0764                 | 0.0                                | Glutamine                      | HMDB0000641    | 2                                      | 8.92                   |
| Urine           | 147.1128 : 0.583:+      | C <sub>6</sub> H <sub>14</sub> N <sub>2</sub> O <sub>2</sub> | 147.1128                 | 0.0                                | Lysine                         | HMDB0000182    | 2                                      | 9.50                   |
| Urine           | 148.0604 : 0.924:+      | C <sub>5</sub> H <sub>9</sub> NO <sub>4</sub>                | 148.0604                 | 0.0                                | Glutamic acid                  | HMDB0003339    | 2                                      | 11.26                  |
| Urine           | 150.0775 : 0.844:+      | C <sub>6</sub> H <sub>7</sub> N <sub>5</sub>                 | 150.0774                 | 0.7                                | <i>Unknown</i>                 |                | 4                                      | 25.74                  |
| Urine           | 156.0768 : 0.620:+      | C <sub>6</sub> H <sub>9</sub> N <sub>3</sub> O <sub>2</sub>  | 156.0767                 | 0.6                                | Histidine                      | HMDB0000177    | 2                                      | 6.84                   |
| Urine           | 160.0970 : 1.089:+      | C <sub>7</sub> H <sub>13</sub> NO <sub>3</sub>               | 160.0968                 | 1.2                                | <i>Unknown</i>                 |                | 2                                      | 9.27                   |

|       |                    |                                                                |          |     |                                     |             |   |       |
|-------|--------------------|----------------------------------------------------------------|----------|-----|-------------------------------------|-------------|---|-------|
| Urine | 162.1125 : 0.714:+ | C <sub>7</sub> H <sub>15</sub> NO <sub>3</sub>                 | 162.1124 | 0.6 | Carnitine                           | HMDB0000062 | 2 | 9.60  |
| Urine | 166.0724 : 0.702:+ | C <sub>6</sub> H <sub>7</sub> N <sub>5</sub> O                 | 166.0723 | 0.6 | Methylguanine                       | HMDB0001566 | 2 | 8.66  |
| Urine | 170.0924 : 0.634:+ | C <sub>7</sub> H <sub>11</sub> N <sub>3</sub> O <sub>2</sub>   | 170.0924 | 0.0 | 3-Methylhistidine                   | HMDB0000479 | 1 | 6.14  |
| Urine | 175.1190 : 0.602:+ | C <sub>6</sub> H <sub>14</sub> N <sub>4</sub> O <sub>2</sub>   | 175.1189 | 0.6 | Arginine                            | HMDB0000517 | 2 | 8.53  |
| Urine | 176.0666 : 0.851:+ | C <sub>5</sub> H <sub>9</sub> N <sub>3</sub> O <sub>4</sub>    | 176.0666 | 0.0 | Guanidinosuccinic acid              | HMDB0003157 | 2 | 5.62  |
| Urine | 176.1030 : 0.772:+ | C <sub>6</sub> H <sub>13</sub> N <sub>3</sub> O <sub>3</sub>   | 176.1029 | 0.6 | Citrulline                          | HMDB0000904 | 2 | 6.46  |
| Urine | 182.0810 : 0.957:+ | C <sub>9</sub> H <sub>11</sub> NO <sub>3</sub>                 | 182.0811 | 0.5 | Tyrosine                            | HMDB0000158 | 2 | 9.86  |
| Urine | 189.1598 : 0.603:+ | C <sub>9</sub> H <sub>20</sub> N <sub>2</sub> O <sub>2</sub>   | 189.1597 | 0.5 | Trimethyllysine                     | HMDB0001325 | 2 | 14.16 |
| Urine | 204.1230 : 0.758:+ | C <sub>9</sub> H <sub>17</sub> NO <sub>4</sub>                 | 204.123  | 0.0 | Acetylcarnitine                     | HMDB0000201 | 2 | 12.37 |
| Urine | 205.0972 : 0.924:+ | C <sub>11</sub> H <sub>12</sub> N <sub>2</sub> O <sub>2</sub>  | 205.0971 | 0.5 | Tryptophan                          | HMDB0000929 | 2 | 28.26 |
| Urine | 217.1560 : 0.847:+ | C <sub>10</sub> H <sub>21</sub> N <sub>2</sub> O <sub>3</sub>  | 217.1546 | 6.4 | Valylvaline                         | HMDB0029140 | 2 | 25.92 |
| Urine | 232.1544 : 0.794:+ | C <sub>11</sub> H <sub>21</sub> NO <sub>4</sub>                | 232.1543 | 0.4 | Butyrylcarnitine                    | HMDB0002013 | 2 | 10.77 |
| Urine | 260.1495 : 0.817:+ | C <sub>12</sub> H <sub>21</sub> NO <sub>5</sub>                | 260.1492 | 1.2 | <i>Unknown</i>                      |             | 4 | 16.33 |
| Urine | 276.1441 : 0.858:+ | C <sub>12</sub> H <sub>21</sub> NO <sub>6</sub>                | 276.1441 | 0.0 | Glutarylcarnitine                   | HMDB0013130 | 2 | 7.71  |
| Urine | 286.2013 : 0.861:+ | C <sub>15</sub> H <sub>27</sub> NO <sub>4</sub>                | 286.2013 | 0.0 | <i>Unknown</i>                      |             | 4 | 9.81  |
| Urine | 367.1509 : 1.084:+ | C <sub>17</sub> H <sub>22</sub> N <sub>2</sub> O <sub>7</sub>  | 367.15   | 2.5 | Mannosyltryptophan                  |             | 2 | 6.60  |
| Urine | 487.2120 : 0.825:+ | C <sub>18</sub> H <sub>34</sub> N <sub>2</sub> O <sub>13</sub> | 487.2134 | 2.9 | Glucosylgalactosyl<br>hydroxylysine | HMDB0000585 | 2 | 8.54  |
| Urine | 89.0244 : 1.534:-  | C <sub>3</sub> H <sub>6</sub> O <sub>3</sub>                   | 89.0243  | 1.1 | Lactic acid                         | HMDB0000190 | 2 | 27.69 |
| Urine | 105.0193 : 1.488:- | C <sub>3</sub> H <sub>6</sub> O <sub>4</sub>                   | 105.0193 | 0.0 | Glycerate                           | HMDB0000139 | 2 | 21.65 |
| Urine | 121.0295 : 1.142:- | C <sub>7</sub> H <sub>6</sub> O <sub>2</sub>                   | 121.0294 | 0.8 | Benzoic acid                        | HMDB0001870 | 2 | 11.25 |
| Urine | 124.9914 : 1.663:- | C <sub>2</sub> H <sub>6</sub> O <sub>4</sub> S                 | 124.9913 | 0.8 | Ethylsulfate                        | HMDB0031233 | 2 | 14.32 |
| Urine | 128.0353 : 1.345:- | C <sub>5</sub> H <sub>7</sub> NO <sub>3</sub>                  | 128.0352 | 0.8 | Oxo-proline                         | HMDB0000267 | 2 | 14.51 |
| Urine | 135.0299 : 1.306:- | C <sub>4</sub> H <sub>8</sub> O <sub>5</sub>                   | 135.0298 | 0.7 | Threonic acid                       | HMDB62620   | 2 | 14.99 |
| Urine | 144.0458 : 1.192:- | C <sub>9</sub> H <sub>7</sub> NO                               | 144.0454 | 2.8 | Indole-3-carboxaldehyde             | HMDB0029737 | 2 | 19.91 |

|       |                    |                                                               |          |     |                                                  |             |   |       |
|-------|--------------------|---------------------------------------------------------------|----------|-----|--------------------------------------------------|-------------|---|-------|
| Urine | 146.0460 : 1.972:- | C <sub>5</sub> H <sub>9</sub> NO <sub>4</sub>                 | 146.0458 | 1.4 | Glutamic acid                                    | HMDB0000148 | 2 | 13.12 |
| Urine | 153.0193 : 1.576:- | C <sub>7</sub> H <sub>6</sub> O <sub>4</sub>                  | 153.0193 | 0.0 | Dihydroxybenzoic acid                            | HMDB0013677 | 2 | 16.22 |
| Urine | 161.9869 : 1.561:- | C <sub>4</sub> H <sub>5</sub> NO <sub>4</sub> S               | 161.9866 | 1.9 | Acesulfame K                                     | HMDB0033585 | 1 | 25.13 |
| Urine | 167.0211 : 1.257:- | C <sub>5</sub> H <sub>4</sub> N <sub>4</sub> O <sub>3</sub>   | 167.021  | 0.6 | Uric acid                                        | HMDB0000289 | 2 | 12.41 |
| Urine | 171.0068 : 1.755:- | C <sub>3</sub> H <sub>9</sub> O <sub>6</sub> P                | 171.0063 | 2.9 | Glycerol phosphate                               | HMDB0002520 | 2 | 8.54  |
| Urine | 177.0229 : 1.180:- | C <sub>6</sub> H <sub>10</sub> O <sub>4</sub> S               | 177.0226 | 1.7 | <i>Unknown</i>                                   |             | 4 | 26.13 |
| Urine | 178.0510 : 1.176:- | C <sub>9</sub> H <sub>9</sub> NO <sub>3</sub>                 | 178.0509 | 0.6 | Hippuric acid                                    | HMDB0000714 | 2 | 22.57 |
| Urine | 181.9917 : 1.463:- | C <sub>7</sub> H <sub>5</sub> NO <sub>3</sub> S               | 181.9917 | 0.0 | Saccharin                                        | HMDB0029723 | 1 | 8.38  |
| Urine | 182.0459 : 1.221:- | C <sub>8</sub> H <sub>9</sub> NO <sub>4</sub>                 | 182.0458 | 0.5 | Pyridoxic acid                                   | HMDB0000017 | 2 | 16.91 |
| Urine | 185.0820 : 1.781:- | C <sub>9</sub> H <sub>14</sub> O <sub>4</sub>                 | 185.0819 | 0.5 | <i>Unknown</i>                                   |             | 4 | 18.92 |
| Urine | 187.0071 : 1.416:- | C <sub>7</sub> H <sub>8</sub> O <sub>4</sub> S                | 187.007  | 0.5 | <i>p</i> -Cresol sulfate                         | HMDB0011635 | 2 | 14.36 |
| Urine | 188.9865 : 1.444:- | C <sub>6</sub> H <sub>6</sub> O <sub>5</sub> S                | 188.9862 | 1.6 | Pyrocatechol sulfate                             | HMDB0059724 | 2 | 32.92 |
| Urine | 191.0552 : 1.142:- | C <sub>7</sub> H <sub>12</sub> O <sub>6</sub>                 | 191.056  | 4.2 | Quinic acid                                      | HMDB0003072 | 2 | 13.44 |
| Urine | 193.0373 : 1.122:- | C <sub>7</sub> H <sub>6</sub> N <sub>4</sub> O <sub>3</sub>   | 193.0366 | 3.6 | <i>Unknown</i>                                   |             | 4 | 13.12 |
| Urine | 212.0023 : 1.357:- | C <sub>8</sub> H <sub>7</sub> NO <sub>4</sub> S               | 212.0022 | 0.5 | Indoxyl sulfate                                  | HMDB0000682 | 2 | 12.04 |
| Urine | 225.0631 : 1.089:- | C <sub>8</sub> H <sub>10</sub> N <sub>4</sub> O <sub>4</sub>  | 225.0629 | 0.9 | 5-Acetylamino-6-formylamino-3-methyluracil       | HMDB0011105 | 2 | 21.23 |
| Urine | 238.0780 : 1.505:- | -                                                             | -        | -   | <i>Unknown</i> [M-2H] <sup>2-</sup>              |             | 4 | 14.49 |
| Urine | 263.1037 : 1.037:- | C <sub>13</sub> H <sub>16</sub> N <sub>2</sub> O <sub>4</sub> | 263.1037 | 0.0 | Phenylacetylglutamine                            | HMDB0006344 | 2 | 12.07 |
| Urine | 283.0827 : 1.012:- | C <sub>13</sub> H <sub>16</sub> O <sub>7</sub>                | 283.0823 | 1.4 | <i>p</i> -Cresol glucuronide                     | HMDB0011686 | 2 | 13.97 |
| Urine | 287.0236 : 1.152:- | C <sub>11</sub> H <sub>12</sub> O <sub>7</sub> S              | 287.023  | 2.1 | Dihydroxyphenyl- $\gamma$ -valerolactone sulfate | HMDB0029191 | 2 | 26.79 |
| Urine | 302.1138 : 1.016:- | C <sub>15</sub> H <sub>17</sub> N <sub>3</sub> O <sub>4</sub> | 302.1146 | 2.6 | Indoleacetyl glutamine                           | HMDB0013240 | 2 | 7.79  |
| Urine | 308.0987 : 0.984:- | C <sub>11</sub> H <sub>19</sub> NO <sub>9</sub>               | 308.0987 | 0.0 | <i>Unknown</i>                                   |             | 4 | 12.74 |
| Urine | 331.1760 : 0.964:- | C <sub>17</sub> H <sub>24</sub> N <sub>4</sub> O <sub>3</sub> | 331.1776 | 4.8 | <i>Unknown</i>                                   |             | 4 | 10.67 |
| Urine | 377.0170 : 1.040:- | C <sub>17</sub> H <sub>6</sub> N <sub>4</sub> O <sub>7</sub>  | 377.0164 | 1.6 | <i>Unknown</i>                                   |             | 4 | 20.45 |

|        |                    |                                                              |          |      |                           |             |   |       |
|--------|--------------------|--------------------------------------------------------------|----------|------|---------------------------|-------------|---|-------|
| Urine  | 473.1453 : 0.934:- | C <sub>24</sub> H <sub>25</sub> O <sub>10</sub>              | 473.1448 | 1.1  | Enterolactone glucuronide | -           | 2 | 14.37 |
| Urine  | 632.2044 : 0.874:- | C <sub>23</sub> H <sub>39</sub> NO <sub>19</sub>             | 632.2043 | 0.2  | Sialyllactose             | HMDB0000825 | 2 | 9.78  |
| Urine  | 112.0515 : 0.710:- | C <sub>4</sub> H <sub>7</sub> N <sub>3</sub> O               | 112.0516 | 0.9  | Creatinine                | HMDB0000562 | 2 | 9.61  |
| Plasma | 76.0402 : 0.732:+  | C <sub>2</sub> H <sub>5</sub> NO <sub>2</sub>                | 76.0393  | 11.8 | Glycine                   | HMDB0000123 | 2 | 8.17  |
| Plasma | 90.0557 : 0.783:+  | C <sub>3</sub> H <sub>7</sub> NO <sub>2</sub>                | 90.0549  | 8.9  | Alanine                   | HMDB0000161 | 2 | 4.15  |
| Plasma | 104.1075 : 0.592:+ | C <sub>5</sub> H <sub>14</sub> NO                            | 104.1075 | 0.0  | Choline                   | HMDB0000097 | 2 | 30.39 |
| Plasma | 106.0500 : 0.864:+ | C <sub>3</sub> H <sub>7</sub> NO <sub>3</sub>                | 106.0498 | 1.9  | Serine                    | HMDB0000187 | 2 | 3.23  |
| Plasma | 114.0662 : 0.635:+ | C <sub>4</sub> H <sub>7</sub> N <sub>3</sub> O               | 114.0653 | 7.9  | Creatinine                | HMDB0000562 | 2 | 32.14 |
| Plasma | 116.0705 : 0.927:+ | C <sub>5</sub> H <sub>9</sub> NO <sub>2</sub>                | 116.0706 | 0.9  | Proline                   | HMDB0000162 | 2 | 3.55  |
| Plasma | 118.0618 : 0.718:+ | C <sub>3</sub> H <sub>7</sub> N <sub>3</sub> O <sub>2</sub>  | 118.0611 | 5.9  | Guanidoacetic acid        | HMDB0000128 | 2 | 9.93  |
| Plasma | 120.0654 : 0.900:+ | C <sub>4</sub> H <sub>9</sub> NO <sub>3</sub>                | 120.0655 | 0.8  | Threonine                 | HMDB0000167 | 2 | 8.14  |
| Plasma | 129.0656 : 0.75:+  | C <sub>5</sub> H <sub>8</sub> N <sub>2</sub> O <sub>2</sub>  | 129.0658 | 1.5  | <i>Unknown</i>            |             | 3 | 6.84  |
| Plasma | 132.0766 : 0.765:+ | C <sub>4</sub> H <sub>9</sub> N <sub>3</sub> O <sub>2</sub>  | 132.0767 | 0.8  | Creatine                  | HMDB0000064 | 2 | 4.80  |
| Plasma | 132.1017 : 0.873:+ | C <sub>6</sub> H <sub>13</sub> NO <sub>2</sub>               | 132.1019 | 1.5  | Leucine/isoleucine        | HMDB0000687 | 2 | 5.20  |
| Plasma | 133.0573 : 0.901:+ | C <sub>4</sub> H <sub>8</sub> N <sub>2</sub> O <sub>3</sub>  | 133.0607 | 25.6 | Asparagine                | HMDB0000168 | 2 | 4.20  |
| Plasma | 137.0459 : 1.066:+ | C <sub>5</sub> H <sub>4</sub> N <sub>4</sub> O               | 137.0458 | 0.7  | Hypoxanthine              | HMDB0000157 | 2 | 12.85 |
| Plasma | 144.0988 : 0.984:+ | C <sub>7</sub> H <sub>13</sub> NO <sub>2</sub>               | 144.1013 | 17.3 | Proline betaine           | HMDB0004827 | 2 | 45.39 |
| Plasma | 146.1182 : 0.699:+ | C <sub>7</sub> H <sub>15</sub> NO <sub>2</sub>               | 146.1176 | 4.1  | Deoxycarnitine            | HMDB0001161 | 3 | 26.48 |
| Plasma | 147.0761 : 0.922:+ | C <sub>5</sub> H <sub>10</sub> N <sub>2</sub> O <sub>3</sub> | 147.0763 | 1.4  | Glutamine                 | HMDB0000641 | 2 | 3.81  |
| Plasma | 148.0603 : 0.934:+ | C <sub>5</sub> H <sub>9</sub> NO <sub>4</sub>                | 148.0603 | 0.0  | Glutamic acid             | HMDB0003339 | 2 | 8.50  |
| Plasma | 150.0583 : 0.910:+ | C <sub>5</sub> H <sub>11</sub> NO <sub>2</sub> S             | 150.0583 | 0.0  | Methionine                | HMDB0000696 | 2 | 4.65  |
| Plasma | 152.0567 : 0.910:+ | C <sub>5</sub> H <sub>5</sub> N <sub>5</sub> O               | 152.0563 | 2.6  | Guanine                   | HMDB0000132 | 2 | 34.61 |
| Plasma | 156.0766 : 0.649:+ | C <sub>6</sub> H <sub>9</sub> N <sub>3</sub> O <sub>2</sub>  | 156.0763 | 1.9  | Histidine                 | HMDB0000177 | 2 | 31.32 |
| Plasma | 160.1332 : 0.725:+ | C <sub>8</sub> H <sub>17</sub> NO <sub>2</sub>               | 160.1323 | 5.6  | 2-Amino-octanoic acid     | HMDB0000991 | 2 | 22.11 |
| Plasma | 162.0761 : 0.933:+ | C <sub>6</sub> H <sub>11</sub> NO <sub>4</sub>               | 162.0753 | 4.9  | Amino-adipic acid         | HMDB0000510 | 2 | 14.34 |

|        |                    |                                                                             |          |     |                            |                             |   |       |
|--------|--------------------|-----------------------------------------------------------------------------|----------|-----|----------------------------|-----------------------------|---|-------|
| Plasma | 162.1123 : 0.735:+ | C <sub>7</sub> H <sub>15</sub> NO <sub>3</sub>                              | 162.1123 | 0.0 | Carnitine                  | HMDB0000062                 | 2 | 3.89  |
| Plasma | 166.086 : 0.9355:+ | C <sub>9</sub> H <sub>11</sub> NO <sub>2</sub>                              | 166.0853 | 4.2 | Phenylalanine              | HMDB0000159                 | 2 | 12.34 |
| Plasma | 170.0922 : 0.663:+ | C <sub>7</sub> H <sub>11</sub> N <sub>3</sub> O <sub>2</sub>                | 170.0923 | 0.6 | Methylhistidine            | HMDB0000479                 | 2 | 15.47 |
| Plasma | 175.1191 : 0.631:+ | C <sub>6</sub> H <sub>14</sub> N <sub>4</sub> O <sub>2</sub>                | 175.1183 | 4.6 | Arginine                   | HMDB0000517                 | 2 | 37.36 |
| Plasma | 176.1025 : 0.943:+ | C <sub>6</sub> H <sub>13</sub> N <sub>3</sub> O <sub>3</sub>                | 176.1023 | 1.1 | Citrulline                 | HMDB0000904                 | 2 | 4.25  |
| Plasma | 182.081 : 0.9616:+ | C <sub>9</sub> H <sub>11</sub> NO <sub>3</sub>                              | 182.0803 | 3.8 | Tyrosine                   | HMDB0000158                 | 2 | 3.52  |
| Plasma | 189.1337 : 0.635:+ | C <sub>7</sub> H <sub>16</sub> N <sub>4</sub> O <sub>2</sub>                | 189.1343 | 3.2 | Monomethylarginine         | HMDB0029416                 | 2 | 44.31 |
| Plasma | 202.1807 : 0.793:+ | C <sub>11</sub> H <sub>23</sub> NO <sub>2</sub>                             | 202.1802 | 2.5 | <i>Unknown</i>             |                             | 4 | 56.73 |
| Plasma | 203.1499 : 0.680:+ | C <sub>8</sub> H <sub>18</sub> N <sub>4</sub> O <sub>2</sub>                | 203.1493 | 3.0 | Dimethylarginine           | HMDB0003334/<br>HMDB0001539 | 2 | 11.69 |
| Plasma | 204.1233 : 0.776:+ | C <sub>9</sub> H <sub>17</sub> NO <sub>4</sub>                              | 204.1223 | 4.9 | Acetylcarnitine            | HMDB0000201                 | 2 | 4.50  |
| Plasma | 205.0966 : 0.931:+ | C <sub>11</sub> H <sub>12</sub> N <sub>2</sub> O <sub>2</sub>               | 205.0963 | 1.5 | Tryptophan                 | HMDB0000929                 | 2 | 17.46 |
| Plasma | 241.0289 : 0.950:+ | C <sub>6</sub> H <sub>12</sub> N <sub>2</sub> O <sub>4</sub> S <sub>2</sub> | 241.0303 | 5.8 | Cystine (disulfide)        | HMDB0000192                 | 2 | 5.04  |
| Plasma | 247.1441 : 1.146:+ | C <sub>14</sub> H <sub>18</sub> N <sub>2</sub> O <sub>2</sub>               | 247.1433 | 3.2 | Tryptophan betaine         | HMDB0061115                 | 2 | 14.53 |
| Plasma | 298.0526 : 0.823:+ | C <sub>8</sub> H <sub>15</sub> N <sub>3</sub> O <sub>5</sub> S <sub>2</sub> | 298.0523 | 1.0 | Cysteinylglycine disulfide | HMDB0000709                 | 2 | 7.87  |
| Plasma | 87.0087 : 1.301:-  | C <sub>3</sub> H <sub>4</sub> O <sub>3</sub>                                | 87.00874 | 0.5 | Pyruvic acid               | HMDB0000243                 | 2 | 14.14 |
| Plasma | 89.0244 : 1.136:-  | C <sub>3</sub> H <sub>6</sub> O <sub>3</sub>                                | 89.02439 | 0.1 | Lactic acid                | HMDB0000190                 | 2 | 8.13  |
| Plasma | 103.0400 : 1.019:- | C <sub>4</sub> H <sub>8</sub> O <sub>3</sub>                                | 103.04   | 0.0 | 3-Hydroxybutyric acid      | HMDB0000357                 | 2 | 6.91  |
| Plasma | 103.0400 : 1.043:- | C <sub>4</sub> H <sub>8</sub> O <sub>3</sub>                                | 103.04   | 0.0 | 2-Hydroxybutyric acid      | HMDB0000008                 | 2 | 11.53 |
| Plasma | 115.0400 : 1.078:- | C <sub>5</sub> H <sub>8</sub> O <sub>3</sub>                                | 115.04   | 0.0 | Alpha-ketoisovaleric acid  | HMDB0000019                 | 2 | 15.83 |
| Plasma | 117.0193 : 1.766:- | C <sub>4</sub> H <sub>6</sub> O <sub>4</sub>                                | 117.0193 | 0.0 | Succinic acid              | HMDB0000254                 | 2 | 31.01 |
| Plasma | 128.0353 : 1.018:- | C <sub>5</sub> H <sub>7</sub> NO <sub>3</sub>                               | 128.0352 | 0.8 | Oxo-proline                | HMDB0000267                 | 2 | 11.92 |
| Plasma | 129.0557 : 1.029:- | C <sub>6</sub> H <sub>10</sub> O <sub>3</sub>                               | 129.0556 | 0.8 | 3-methyl-2-oxovaleric acid | HMDB0000491                 | 2 | 13.47 |
| Plasma | 132.0302 : 1.073:- | C <sub>4</sub> H <sub>7</sub> NO <sub>4</sub>                               | 132.0302 | 0.0 | Aspartic acid              | HMDB0006483                 | 2 | 12.40 |
| Plasma | 133.0142 : 1.783:- | C <sub>4</sub> H <sub>6</sub> O <sub>5</sub>                                | 133.0142 | 0.0 | Malic acid                 | HMDB0000744                 | 2 | 32.51 |

|        |                    |                                                             |          |     |                       |             |   |       |
|--------|--------------------|-------------------------------------------------------------|----------|-----|-----------------------|-------------|---|-------|
| Plasma | 167.021 : 0.969:-  | C <sub>5</sub> H <sub>4</sub> N <sub>4</sub> O <sub>3</sub> | 167.021  | 0.0 | Uric acid             | HMDB0000289 | 2 | 11.10 |
| Plasma | 179.0561 : 0.999:- | C <sub>6</sub> H <sub>12</sub> O <sub>6</sub>               | 179.056  | 0.6 | Glucose               | HMDB0000122 | 2 | 11.73 |
| Plasma | 191.0197 : 1.967:- | C <sub>6</sub> H <sub>8</sub> O <sub>7</sub>                | 191.0197 | 0.0 | Citric acid           | HMDB0000094 | 2 | 21.51 |
| Plasma | 195.051 : 0.889:-  | C <sub>6</sub> H <sub>12</sub> O <sub>7</sub>               | 195.051  | 0.0 | Gluconic acid         | HMDB0000625 | 2 | 13.37 |
| Plasma | C14:0 : 10.15      | C <sub>14</sub> H <sub>28</sub> O <sub>2</sub>              | 227.2017 | -   | Myristic acid         | HMDB0000806 | 2 | 19.55 |
| Plasma | C15:0 : 10.79      | C <sub>15</sub> H <sub>30</sub> O <sub>2</sub>              | 241.2173 | -   | Pentadecanoic acid    | HMDB0000826 | 2 | 13.63 |
| Plasma | C16:0 : 11.43      | C <sub>16</sub> H <sub>32</sub> O <sub>2</sub>              | 255.233  | -   | Palmitic acid         | HMDB0000220 | 2 | 12.70 |
| Plasma | C16:1 1 : 11.74    | C <sub>16</sub> H <sub>30</sub> O <sub>2</sub>              | 253.2173 | -   | Hexadecenoic acid     | HMDB0037647 | 2 | 13.16 |
| Plasma | C16:1 2 : 11.82    | C <sub>16</sub> H <sub>30</sub> O <sub>2</sub>              | 253.2173 | -   | Palmitoleic acid      | HMDB0003229 | 2 | 14.46 |
| Plasma | C17:0 : 12.06      | C <sub>17</sub> H <sub>34</sub> O <sub>2</sub>              | 269.2486 | -   | Margaric acid         | HMDB0002259 | 2 | 12.27 |
| Plasma | C18:0 : 12.77      | C <sub>18</sub> H <sub>36</sub> O <sub>2</sub>              | 283.2643 | -   | Stearic acid          | HMDB0000827 | 2 | 13.24 |
| Plasma | C18:1 1 : 13.20    | C <sub>18</sub> H <sub>34</sub> O <sub>2</sub>              | 281.2486 | -   | Elaidic acid          | HMDB0000573 | 2 | 11.85 |
| Plasma | C18:1 2 : 13.26    | C <sub>18</sub> H <sub>34</sub> O <sub>2</sub>              | 281.2486 | -   | Oleic acid            | HMDB0000207 | 2 | 8.50  |
| Plasma | C18:2 1 : 13.92    | C <sub>18</sub> H <sub>32</sub> O <sub>2</sub>              | 279.233  | -   | Linoleic acid         | HMDB0000673 | 2 | 13.94 |
| Plasma | C18:2 2 : 15.02    | C <sub>18</sub> H <sub>32</sub> O <sub>2</sub>              | 279.233  | -   | Linoelaidic acid      | HMDB0006270 | 2 | 33.45 |
| Plasma | C18:3 1 : 14.47    | C <sub>18</sub> H <sub>30</sub> O <sub>2</sub>              | 277.2173 | -   | γ-Linolenic acid      | HMDB0003073 | 2 | 17.16 |
| Plasma | C18:3 2 : 14.82    | C <sub>18</sub> H <sub>30</sub> O <sub>2</sub>              | 277.2173 | -   | α-Linolenic acid      | HMDB0001388 | 2 | 14.86 |
| Plasma | C20:0 : 14.37      | C <sub>20</sub> H <sub>40</sub> O <sub>2</sub>              | 311.2956 | -   | Arachidic acid        | HMDB0002212 | 2 | 13.34 |
| Plasma | C20:1 : 14.88      | C <sub>20</sub> H <sub>38</sub> O <sub>2</sub>              | 309.2799 | -   | Eicosenoic acid       | HMDB0002231 | 2 | 30.24 |
| Plasma | C20:2 : 15.75      | C <sub>20</sub> H <sub>36</sub> O <sub>2</sub>              | 307.2643 | -   | Eicosadienoic acid    | HMDB0005060 | 2 | 19.19 |
| Plasma | C20:3 1 : 16.41    | C <sub>20</sub> H <sub>34</sub> O <sub>2</sub>              | 305.2486 | -   | Eicosatrienoic acid   | HMDB0002925 | 2 | 11.94 |
| Plasma | C20:3 2 : 17.44    | C <sub>20</sub> H <sub>34</sub> O <sub>2</sub>              | 305.2486 | -   | Unknown               |             | 4 | 18.70 |
| Plasma | C20:4 : 16.94      | C <sub>20</sub> H <sub>32</sub> O <sub>2</sub>              | 303.233  | -   | Arachidonic acid      | HMDB0001043 | 2 | 13.71 |
| Plasma | C20:5 : 18.18      | C <sub>20</sub> H <sub>30</sub> O <sub>2</sub>              | 301.2173 | -   | Eicosapentaenoic acid | HMDB0001999 | 2 | 17.27 |
| Plasma | C22:0 : 16.34      | C <sub>22</sub> H <sub>44</sub> O <sub>2</sub>              | 339.3269 | -   | Behenic acid          | HMDB0000944 | 2 | 13.57 |

---

|        |                 |                   |          |   |                      |             |   |       |
|--------|-----------------|-------------------|----------|---|----------------------|-------------|---|-------|
| Plasma | C22:5 1 : 19.43 | $C_{22}H_{34}O_2$ | 329.2486 | - | <i>Unknown</i>       |             | 4 | 13.76 |
| Plasma | C22:5 2 : 20.8  | $C_{22}H_{34}O_2$ | 329.2486 | - | Docosapentaenoic     | HMDB0006528 | 2 | 14.12 |
| Plasma | C22:6 : 21.34   | $C_{22}H_{32}O_2$ | 327.233  | - | Docosahexaenoic acid | HMDB0062579 | 2 | 12.88 |
| Plasma | C24:0 : 18.63   | $C_{24}H_{48}O_2$ | 367.3582 | - | Lignoceric acid      | HMDB0002003 | 2 | 12.15 |
| Plasma | C24:1 : 19.28   | $C_{24}H_{46}O_2$ | 365.3425 | - | Nervonic acid        | HMDB0002368 | 2 | 10.88 |

---

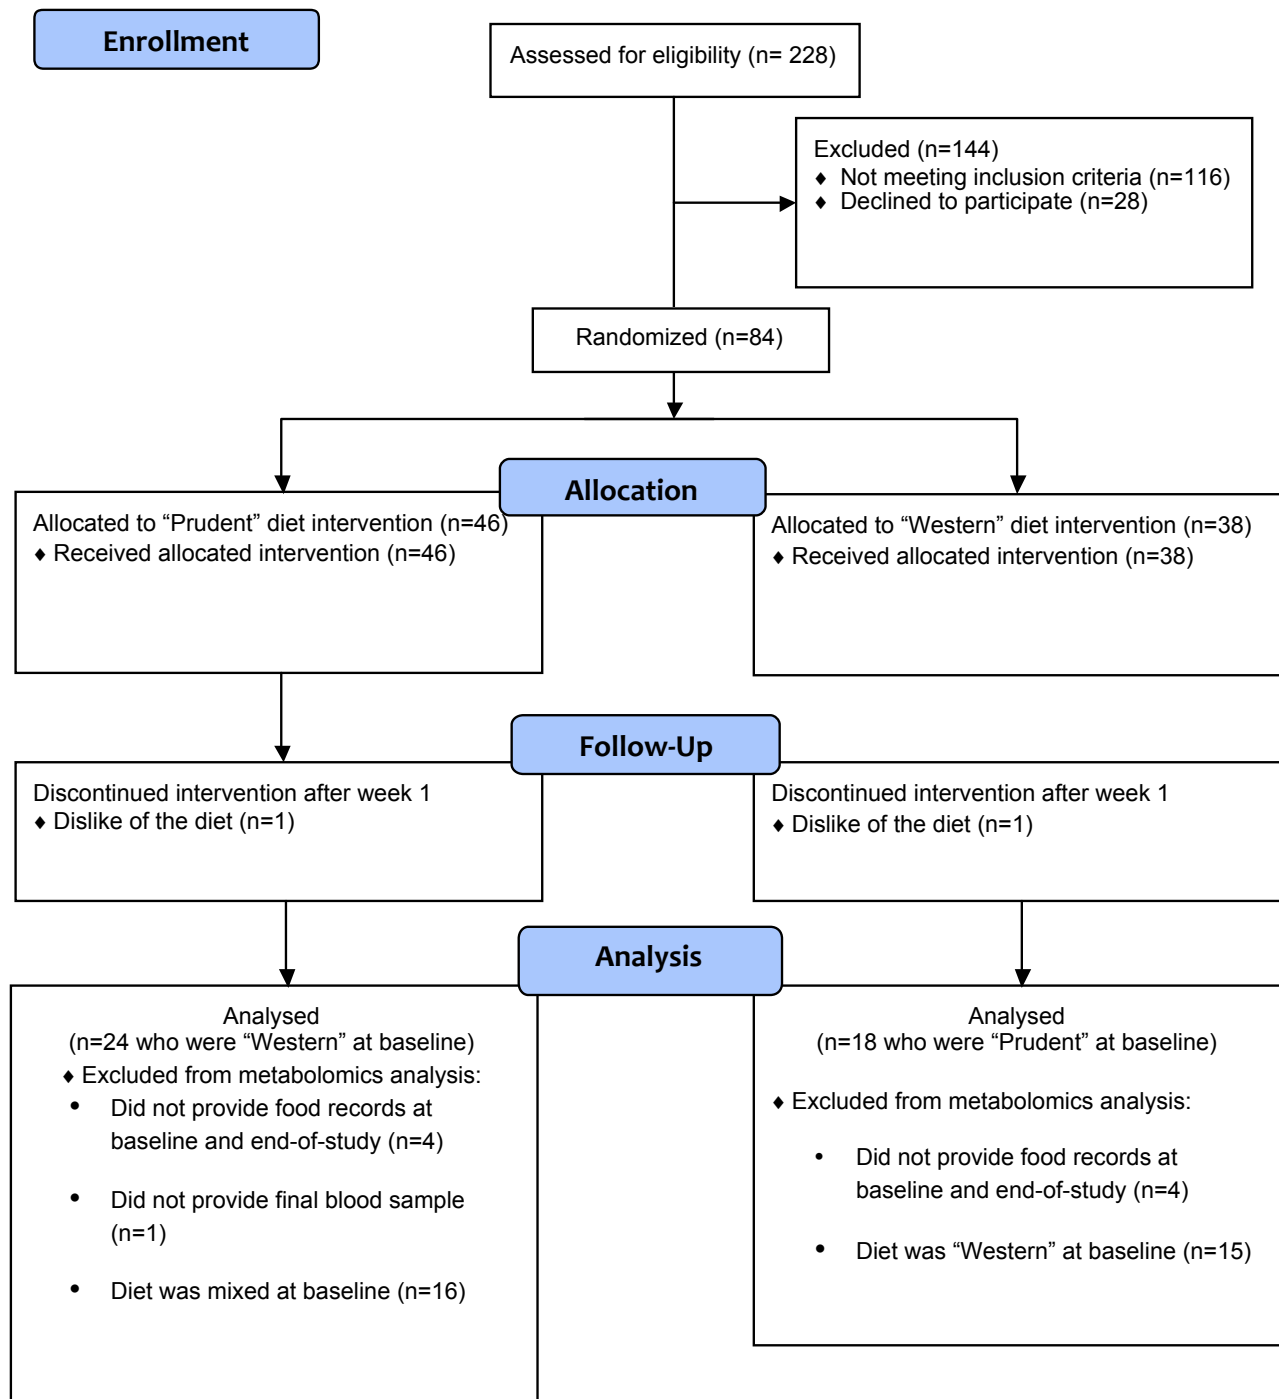

**Figure S1.** A CONCERT flow diagram outlining selection criteria used in a parallel two-arm randomized clinical trial involving participants from the DIGEST study, where metabolomic analyses was performed unblinded on paired serum and urine samples collected at baseline and 2 weeks following a provisional Prudent or Western diet. Overall, 73 of the 84 participants who completed DIGEST had available specimens and complete food records. However, in order to maximize the effect size of this short-term dietary intervention, metabolomic analyses was performed only on a subset of participants ( $n=42$ ) who had contrasting habitual diets at baseline as evaluated based on an aggregate diet quality score.

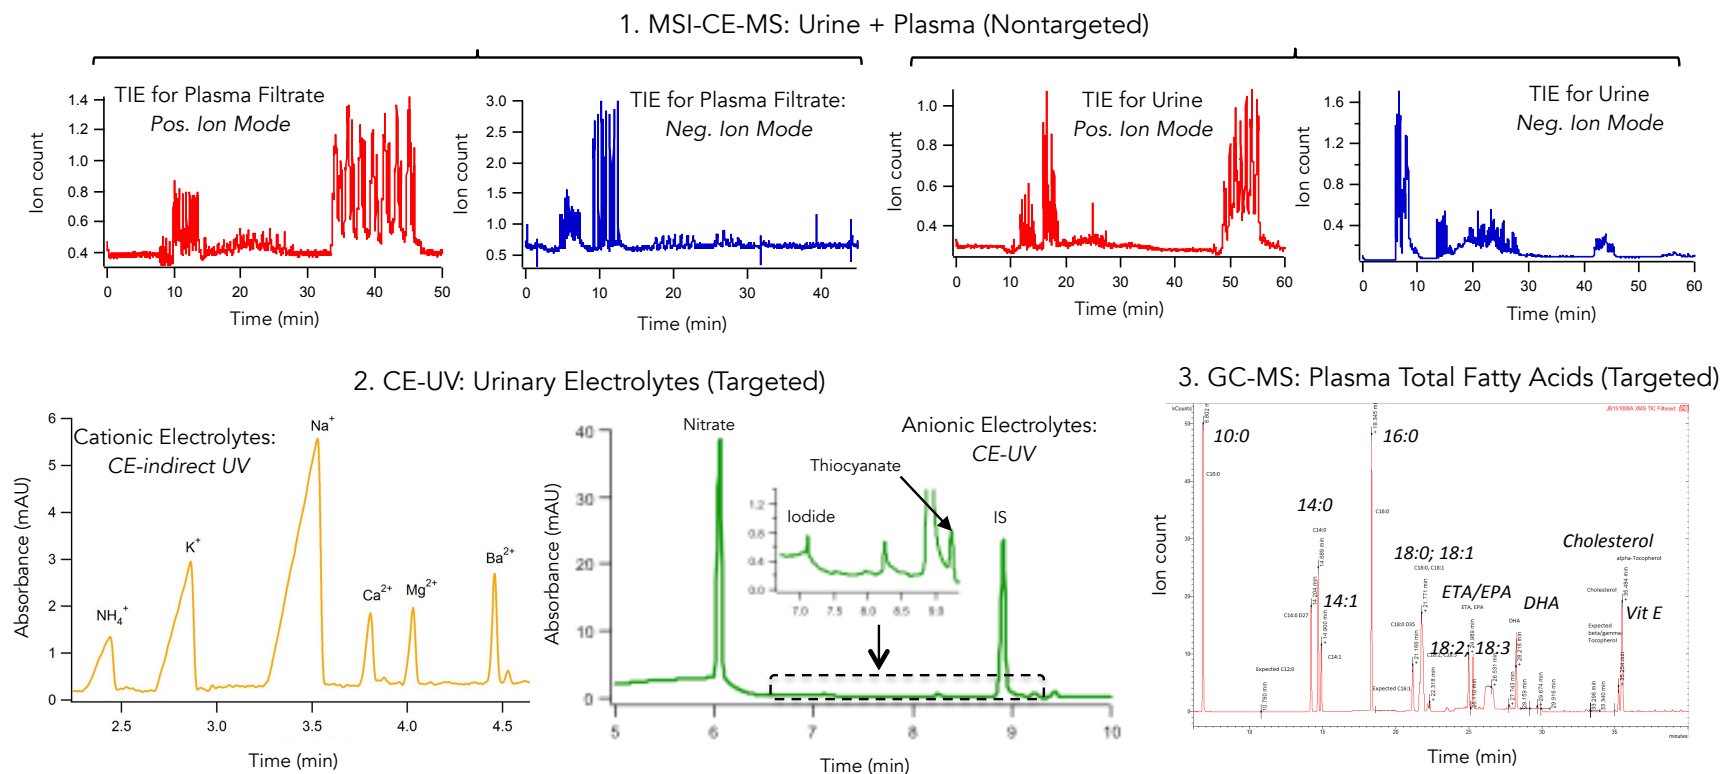

**Figure S2.** Overview of three major analytical platforms for nontargeted and targeted metabolite/electrolyte profiling of matching plasma and urine specimens from DIGEST participants at baseline and 2 weeks following an assigned Prudent or Western diet from food provisions. MSI-CE-MS was used as the major format for metabolomic analyses of a wide range of polar/ionic metabolites from both plasma filtrate and diluted urine samples when using a stringent data workflow for metabolite authentication with quality control. Also, CE with (indirect/direct) UV absorbance detection was used for targeted analysis of electrolytes in urine, including inorganic cations (*e.g.*, sodium) and strong anions (*e.g.*, nitrate), whereas GC-MS was applied for targeted analysis of total (hydrolyzed) fatty acids as their FAMES from plasma extracts.

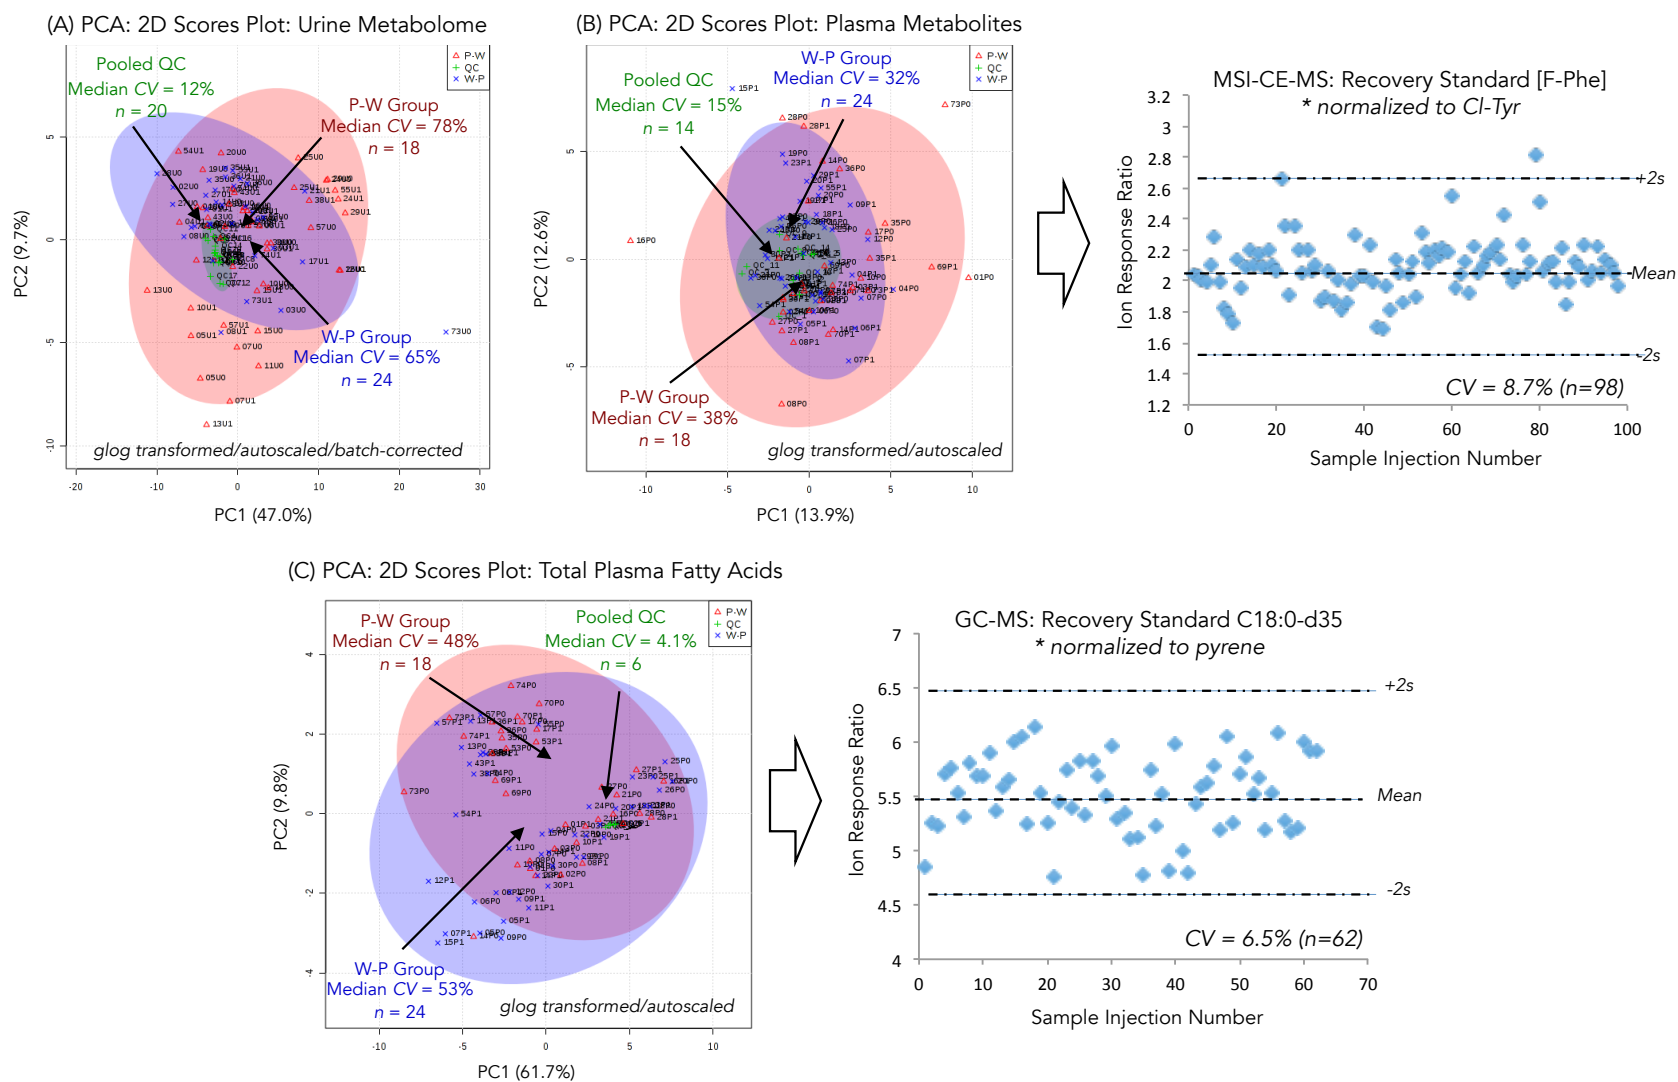

**Figure S3.** 2D scores plots from PCA and control charts for recovery standards that highlight the good technical precision as compared to biological variance of metabolomic data from three instrumental platforms, including (C) 84 authenticated urine metabolites after QC-based batch-correction, (B) 50 polar/ionic metabolites from plasma using MSI-CE-MS, as well as (C) 26 plasma (total) fatty acids using GC-MS.

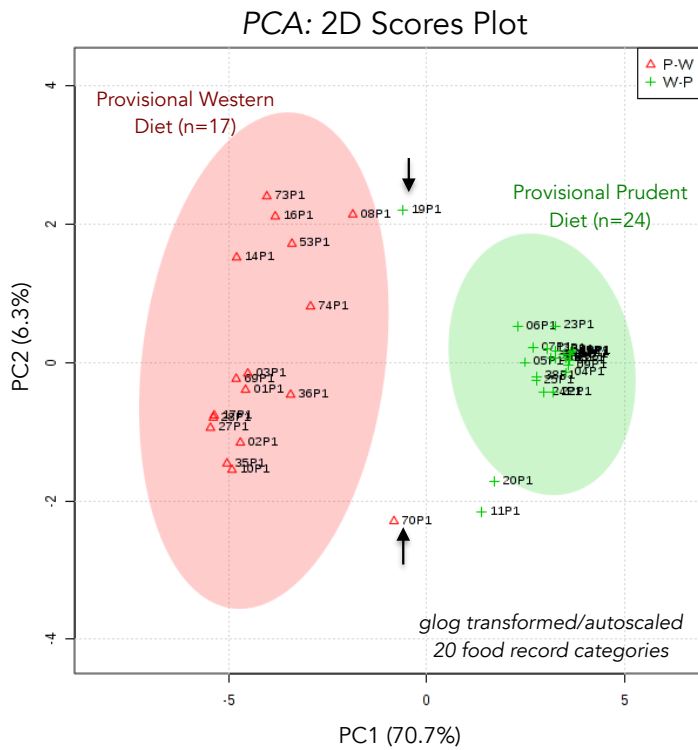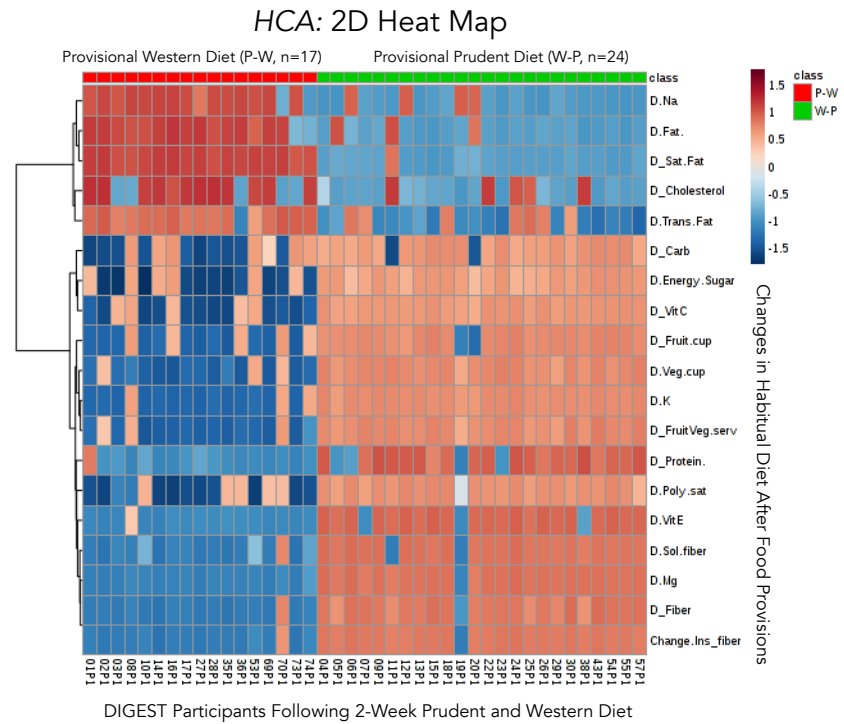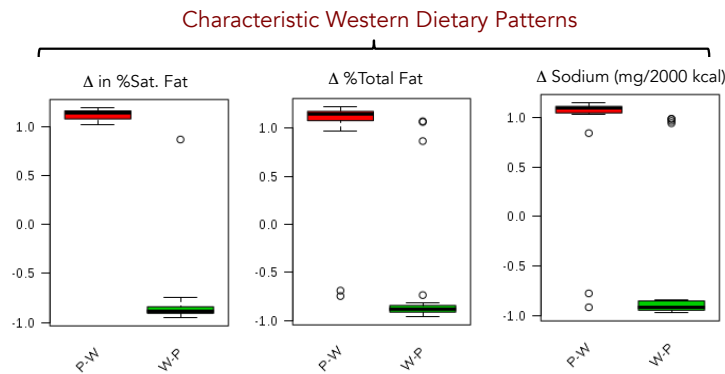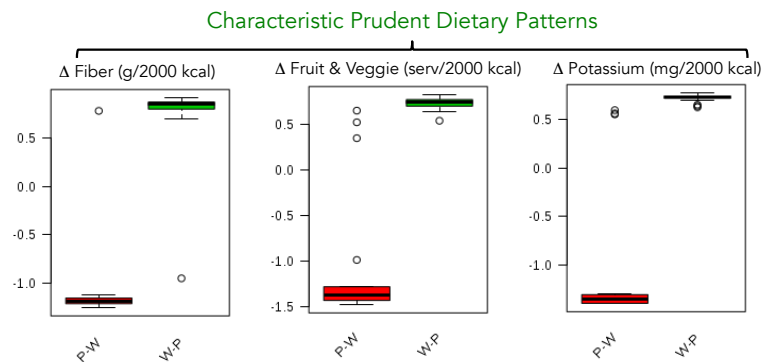

**Figure S4.** 2D scores plot from PCA and HCA/heat map summarizing changes in habitual diet (W-P and P-W) based on 20 macro-/micronutrient categories self-reported food records from DIGEST participants following 2 weeks of contrasting food provisions as compared to their baseline diet.

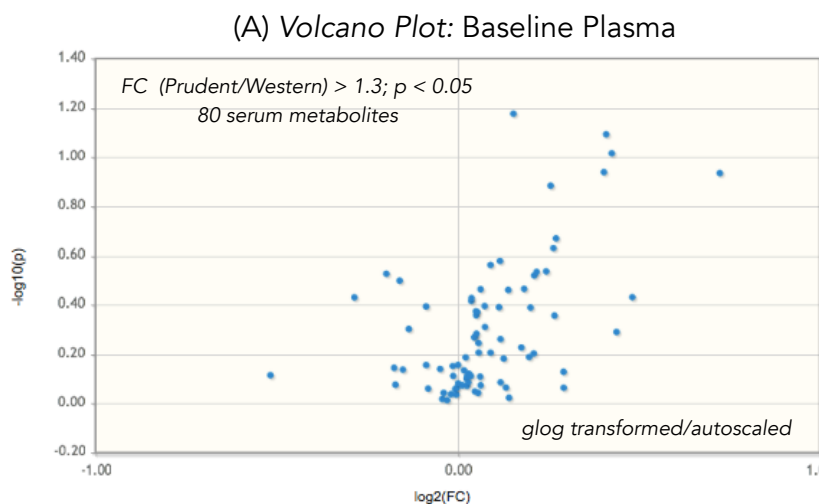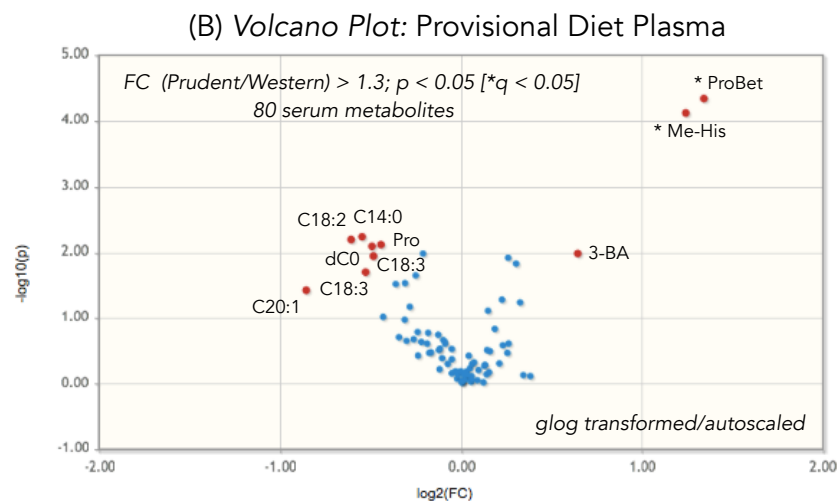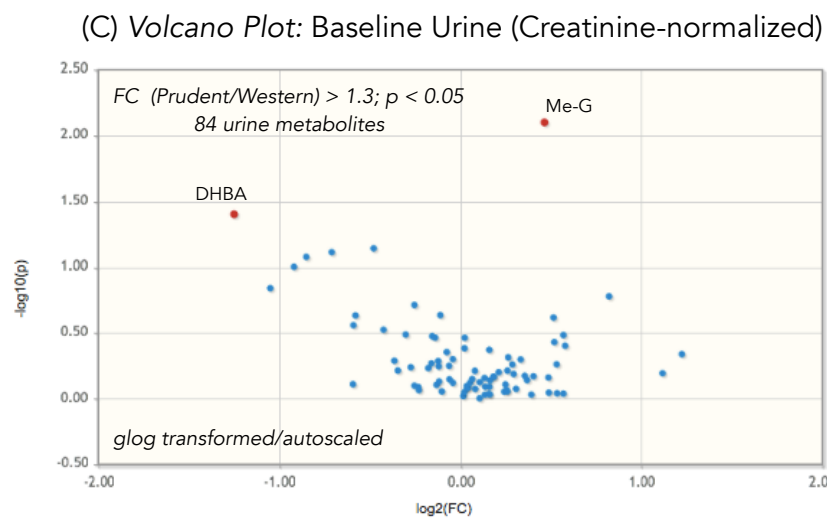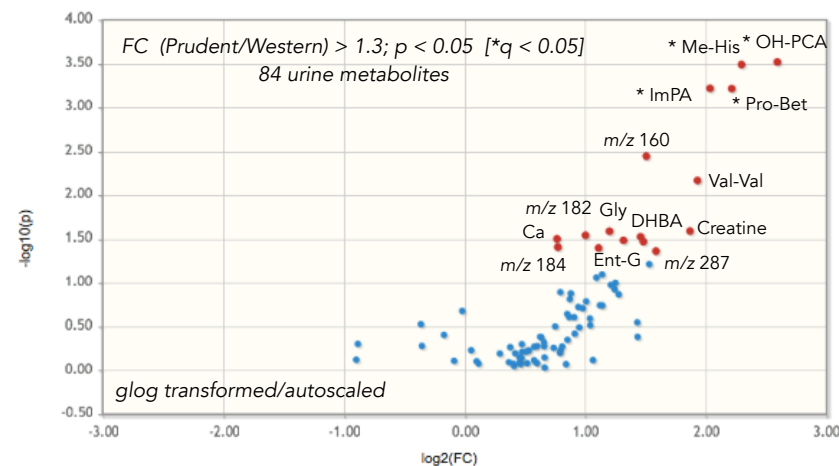

**Figure S5.** Series of volcano plots for urine (A, C) and plasma (B, D) metabolome data highlighting few differences in the metabolic phenotype among DIGEST participants ( $n=42$ ) at baseline as compared to major changes following two weeks of contrasting diets from food provisions based on a minimum threshold for significance (mean  $FC > 1.3$ ,  $p < 0.05$ ) between Prudent and Western assigned groups (mean  $FC > 1.3$  and  $p < 0.05$ ). Abbreviations refer to DHBA (dihydroxybenzoic acid), ProBet (proline betaine), Me-His (3-methylhistidine), 3-OH-BA (3-hydroxybutyric acid), dC0 (deoxycarnitine), Pro (proline), OH-PCA (hydroxypipercolic acid), ImPA (imidazolepropionic acid), Ent-G (enterolactone glucuronide), DHBA (dihydroxybenzoic acid) and Me-G (methylguanine), whereas standard notation are used for plasma fatty acids and unknown ions denoted by their accurate mass ( $m/z$ ).

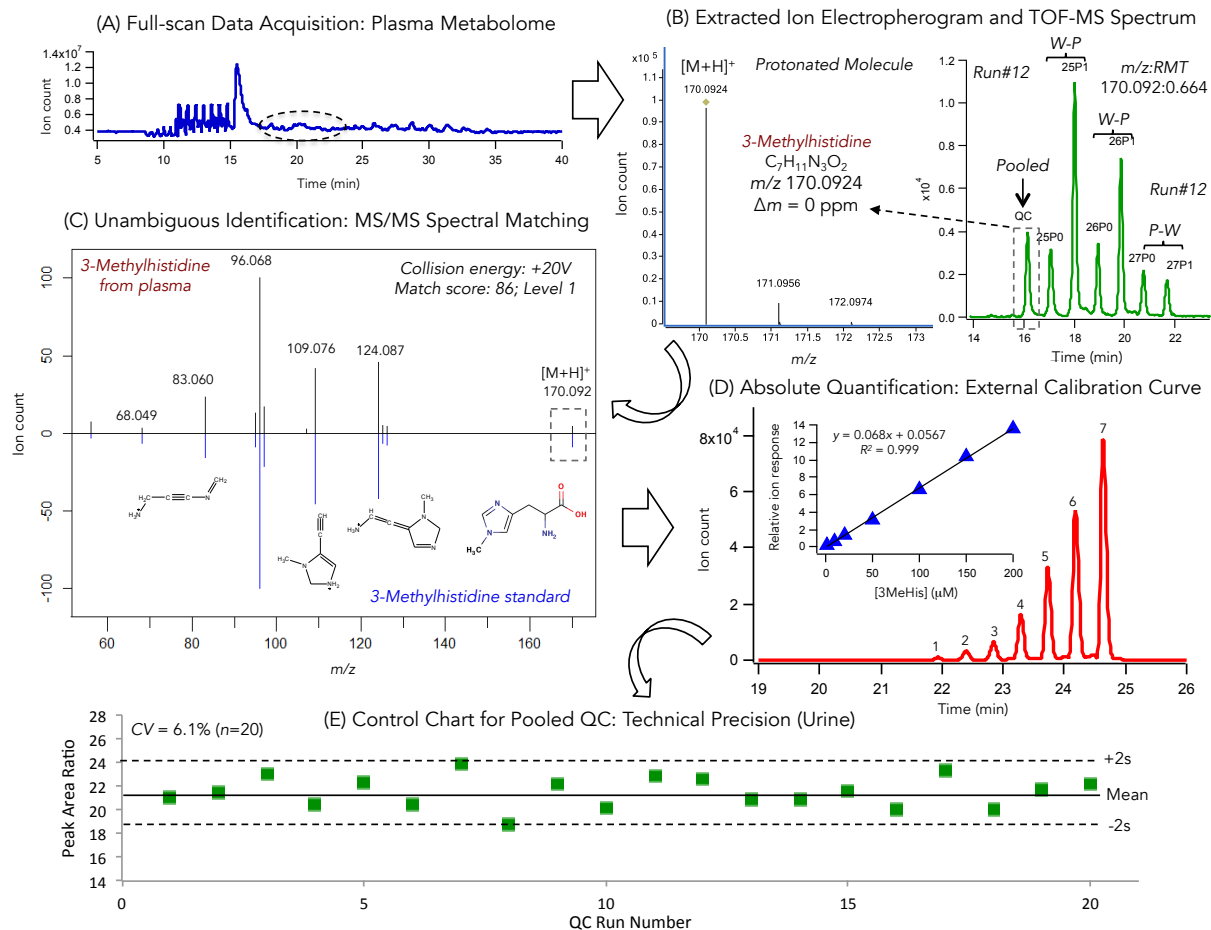

**Figure S6.** (A) Metabolomics data workflow for the identification and quantification of biomarkers of a provisional Prudent diet (e.g., 3-methylhistidine annotated based on its  $m/z$ :RMT) when using full-scan data acquisition. (B) Multiplexed separations by MSI-CE-MS based on serial injection of seven plasma filtrate (or diluted urine) samples within a single run, including paired samples from each DIGEST participant (i.e., baseline/post-treatment) together with a pooled sample as QC for assessing technical precision and long-term signal drift. High resolution MS under positive ion mode detection allows for determination of most likely molecular formula for unknown cation (i.e., protonated molecular ion), whereas (C) MS/MS spectra is used for its structural elucidation when compared with an authentic standard. (D) Quantification for metabolites is then performed by external calibration when using an internal standard (Cl-Tyr) for data normalization by MSI-CE-MS. (E) A control chart for Me-His from pooled urine samples as QC analyzed in random positions in every run demonstrates acceptable technical precision over 3 days.

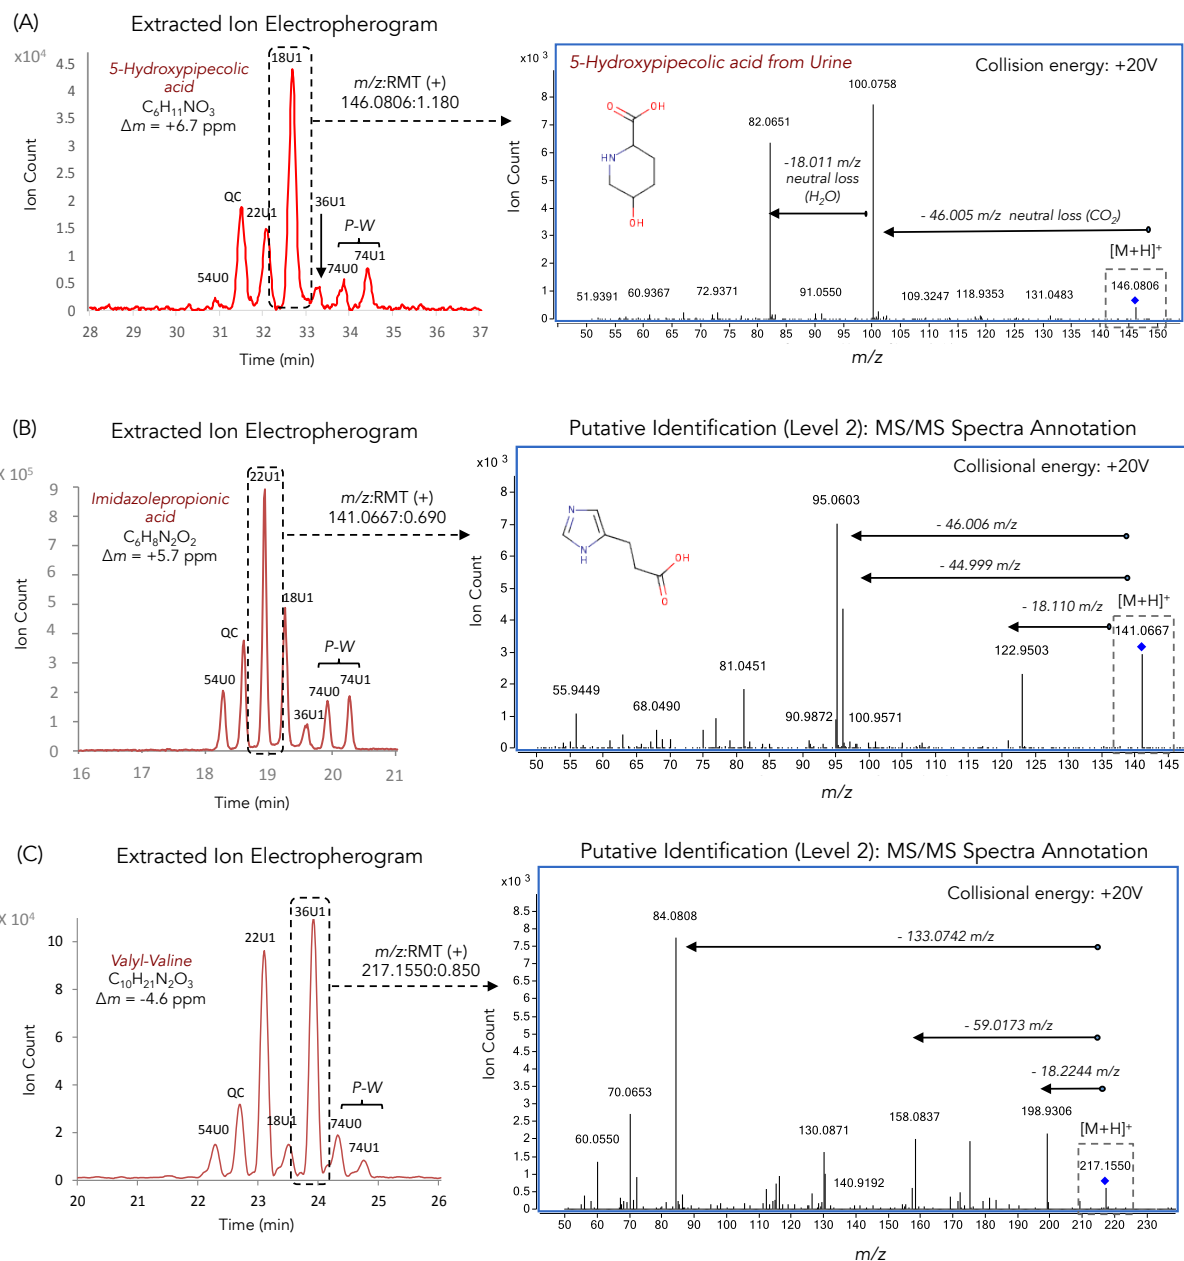

**Figure S7.** Putative identification (level 2) of three unknown cationic metabolites ( $MH^+$ ) detected in urine specimens from DIGEST participants that were significantly elevated in assigned Prudent ( $p < 0.05$ ) as compared to Western diet following 2 weeks of food provisions, namely (A) 5-hydroxypipelic acid (OH-PCA,  $m/z$  146.081), (B) imidazole propionic acid (ImPA,  $m/z$  141.067) and (C) Valinyl-valine (Val-Val,  $m/z$  217.155) based on their characteristic MS/MS spectra (optimal collision energy at 20 V) under positive ion mode conditions.

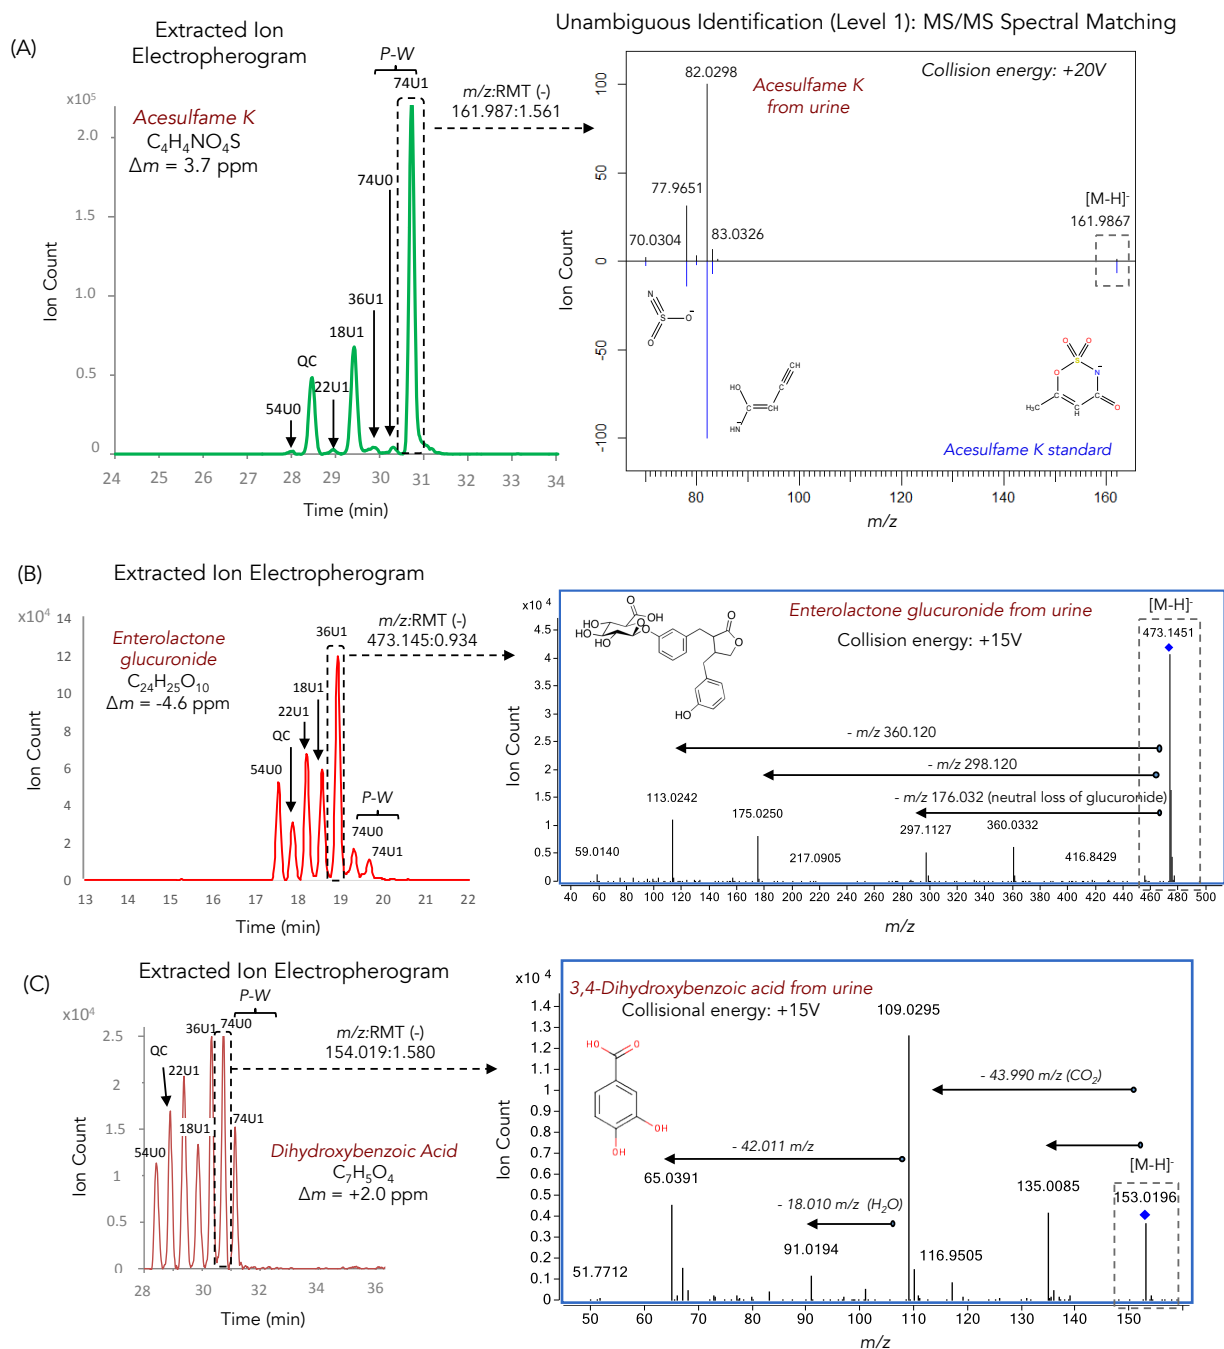

**Figure S8.** Unambiguous (level 1) and putative identification (level 2) of three unknown anionic metabolites (M-H) detected in urine specimens from DIGEST participants that were decreased (acesulfame K) or elevated (enterolactone glucuronide and dihydroxybenzoic acid) in assigned Prudent ( $p < 0.05$ ) as compared to Western diet groups following 2 weeks of food provisions, namely (A) acesulfame K (ASK,  $m/z$  161.987), (B) enterolactone glucuronide (Ent-G,  $m/z$  473.145) and (C) dihydroxybenzoic acid (DHBA,  $m/z$  153.020) based on their characteristic MS/MS spectra (optimal collision energies at 15 or 20 V) under negative ion mode conditions. Confident identification was derived from comparison of MS/MS spectra with a standard as shown in mirror plot for acesulfame K together with spiking into urine sample to confirm co-migration. The likely stereochemistry for DHBA was deduced from comparison of *in silico* MS/MS spectra when using HMDB, whereas Ent-G was tentatively identified based on comparison with published MS/MS spectra [Johnson et al. *Metabolites* **2013**, 3: 658-672].

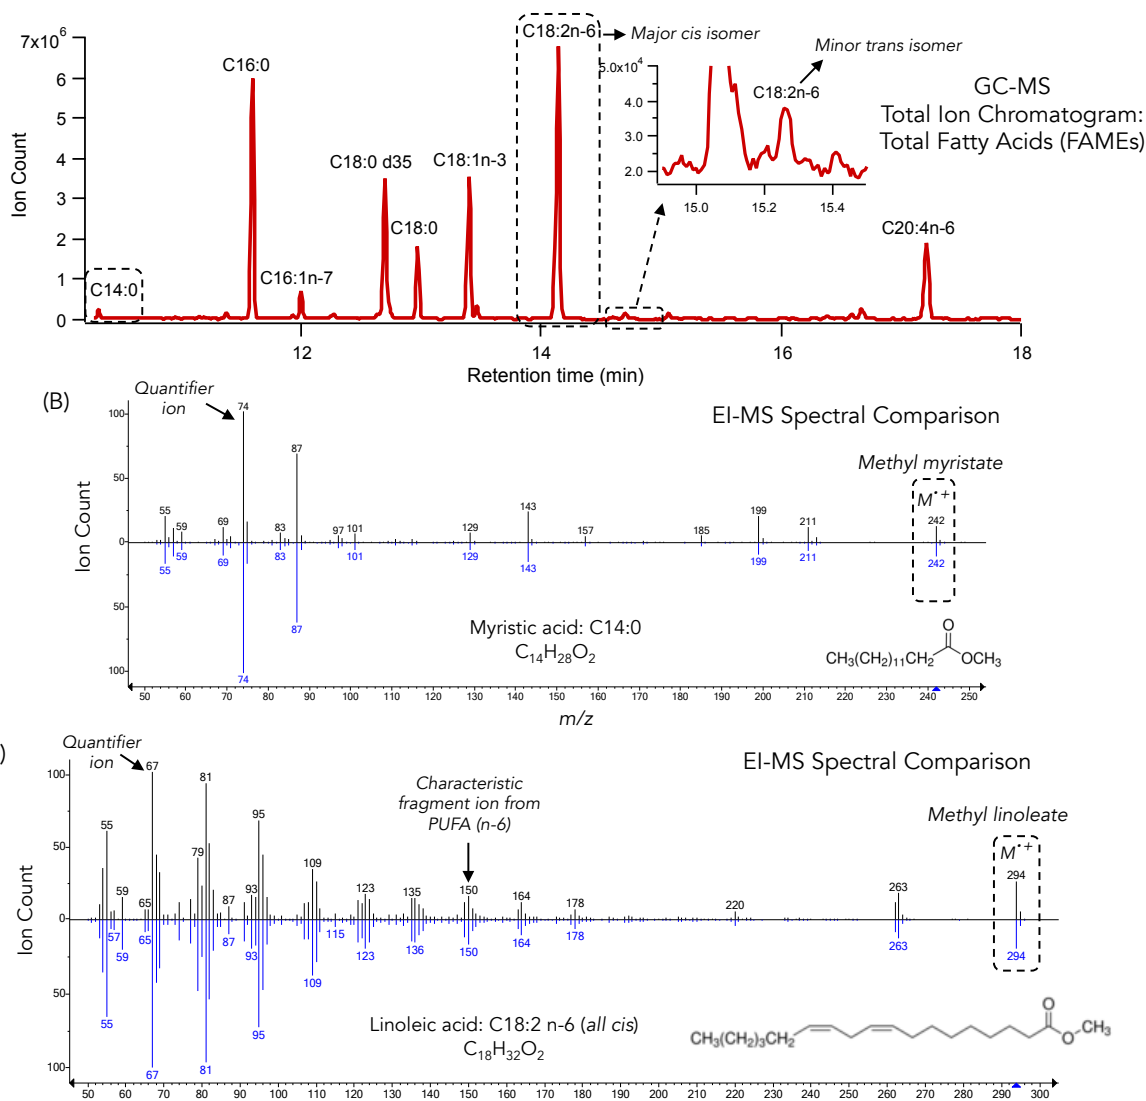

**Figure S9.** Unambiguous identification (level 1) of total (hydrolyzed) fatty acids as their FAME derivatives from plasma extracts when using GC-MS, including resolution of low abundance *trans*-isomer (linoelaidic acid, C18:2n-6*trans*) from major *cis*-isomer (linoleic acid, C18:2n-6*cis*), including detection of minor saturated fatty acids (myristic acid, C14:0). Mirror plots for EI-MS spectra show excellent matches when comparing FAMES detected in plasma extracts as compared to their references in the NIST database, where the base peak ions correspond to the quantifier ions monitored for saturated and polyunsaturated fatty acids. Overall, plasma total C18:2n-6*cis* was only 0.34% of its major stereoisomer C18:2n-6*trans* that also represents the most abundant fatty acid measured in circulation.

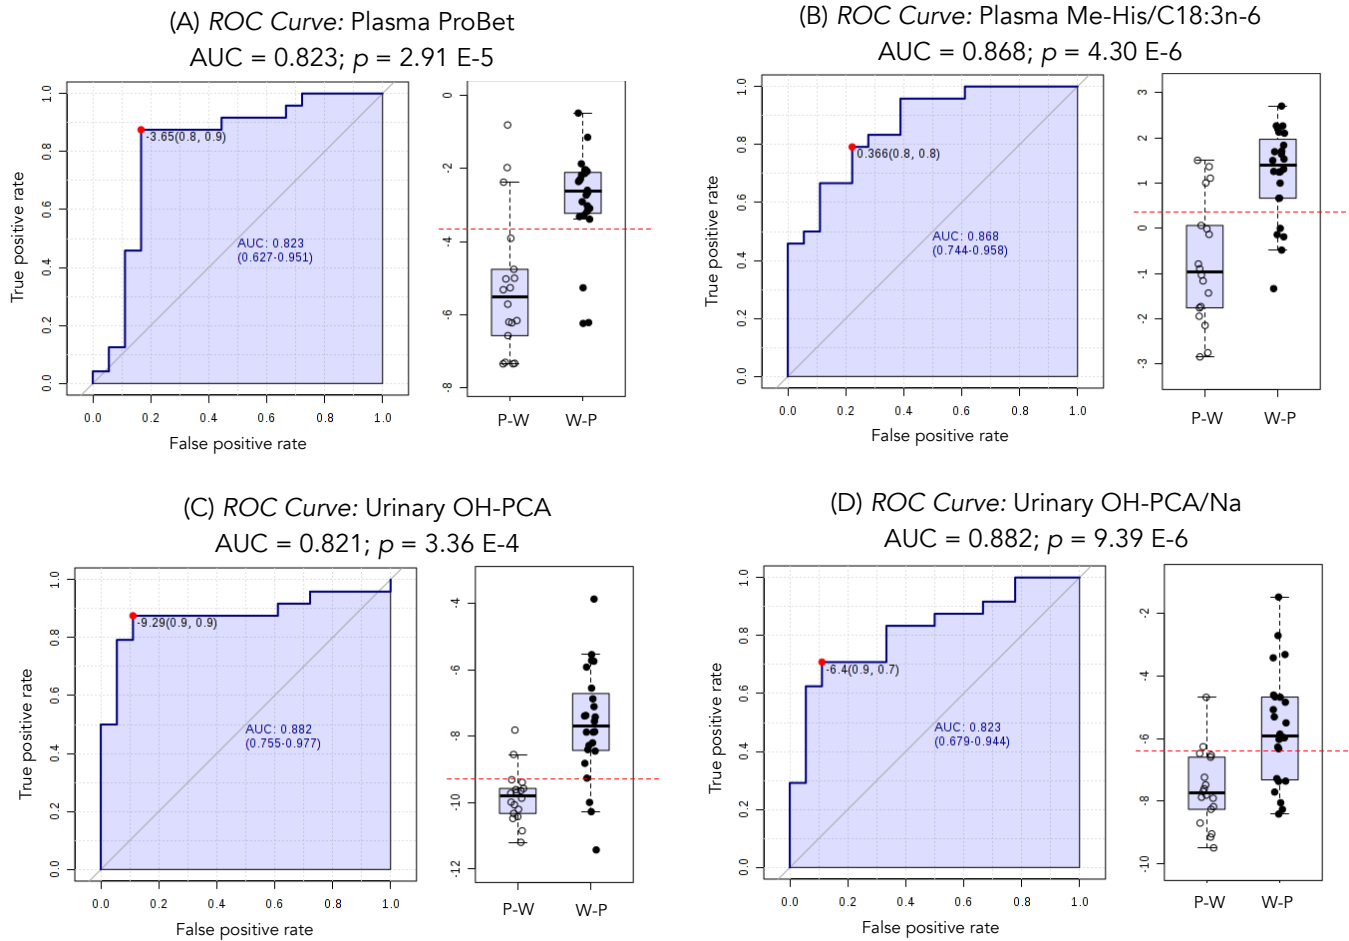

**Figure S10.** Top-ranked single and ratiometric metabolites for differentiation of DIGEST participants assigned a Prudent (W-P,  $n=24$ ) or Western (P-W,  $n=18$ ) diet following 2 weeks of food provisions when using receiver operating characteristic (ROC) curves. All metabolites were  $glog$ -transformed, whereas urine metabolites were normalized to creatinine following a QC-based batch correction. Overall, there was good discrimination of contrasting dietary patterns ( $AUC > 0.820$ ;  $p < 0.001$ ) as shown for (A) plasma proline betaine (ProBet), (B) plasma 3-methylhistidine to  $\alpha$ -linoleic acid (MeHis/C18:3n-6) ratio, (C) urinary hydroxypipercolic acid (OH-PCA), and (D) urinary hydroxypipercolic acid to sodium ratio (OH-PCA/Na).

Top-ranked Plasma Metabolic Trajectories Associated with Prudent and/or Western Diet from Food Provisions in DIGEST

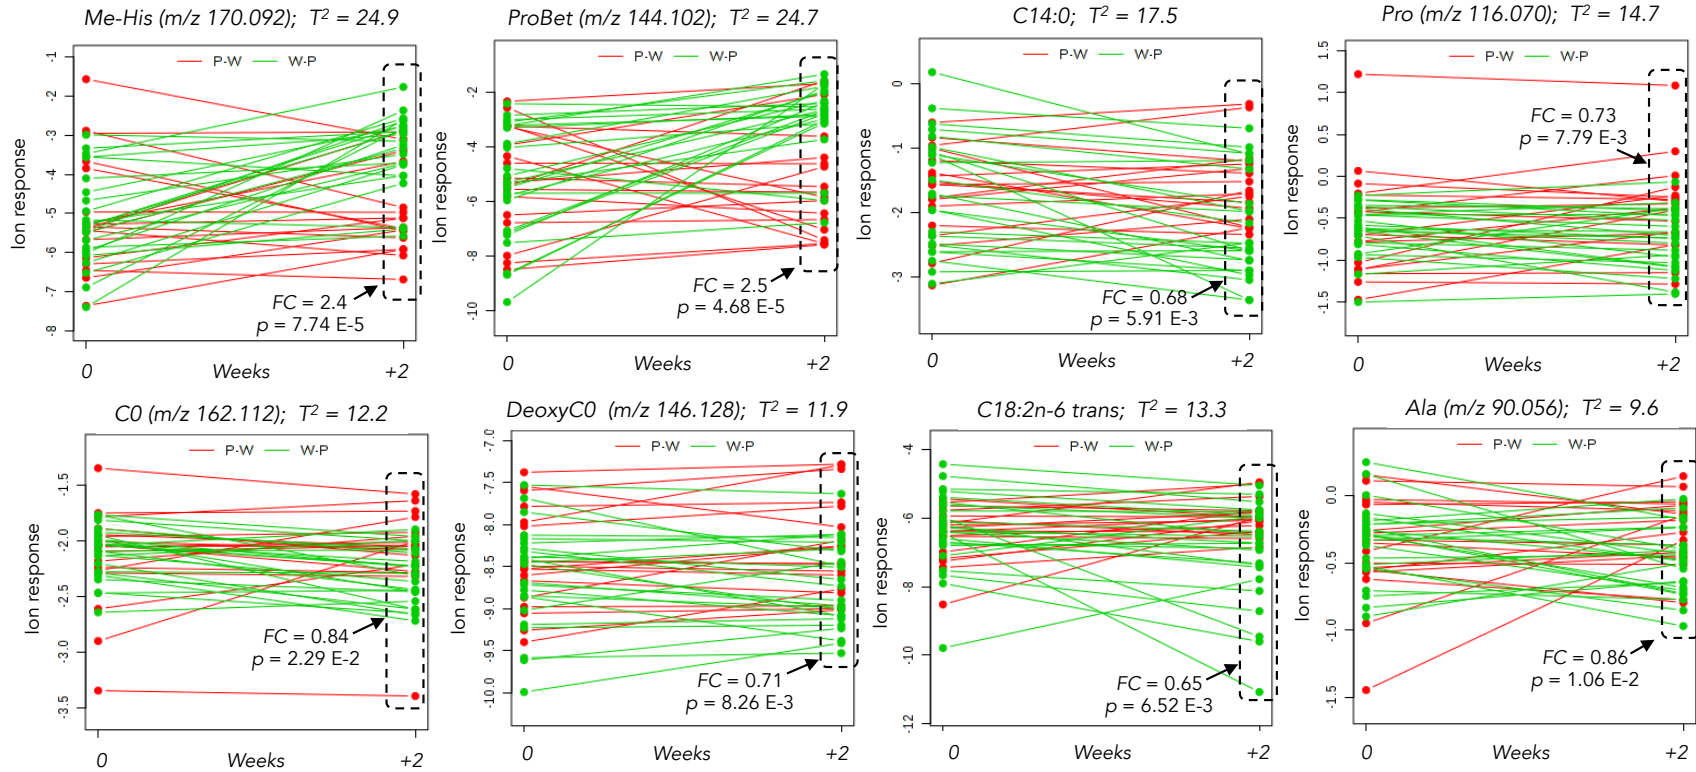

**Figure S11.** Top-ranked plasma metabolites associated with contrasting Prudent (W-P) and Western (P-W) diets from food provisions when using *glog*-transformed ion responses measured at baseline (habitual diet, 0) and following food provisions (2 weeks) for DIGEST participants ( $n=42$ ). Metabolic trajectories from time course studies were ranked based on Hotelling- $T^2$  values when using multivariate empirical Bayes analysis of variance (MEBA) together with student's t-test to confirm statistical significance ( $p < 0.05$ ) occurring after assigned diets as compared to baseline habitual diets ( $p > 0.05$ ).

Top-ranked Urinary Metabolic Trajectories Associated with Prudent and/or Western Diet from Food Provisions in DIGEST

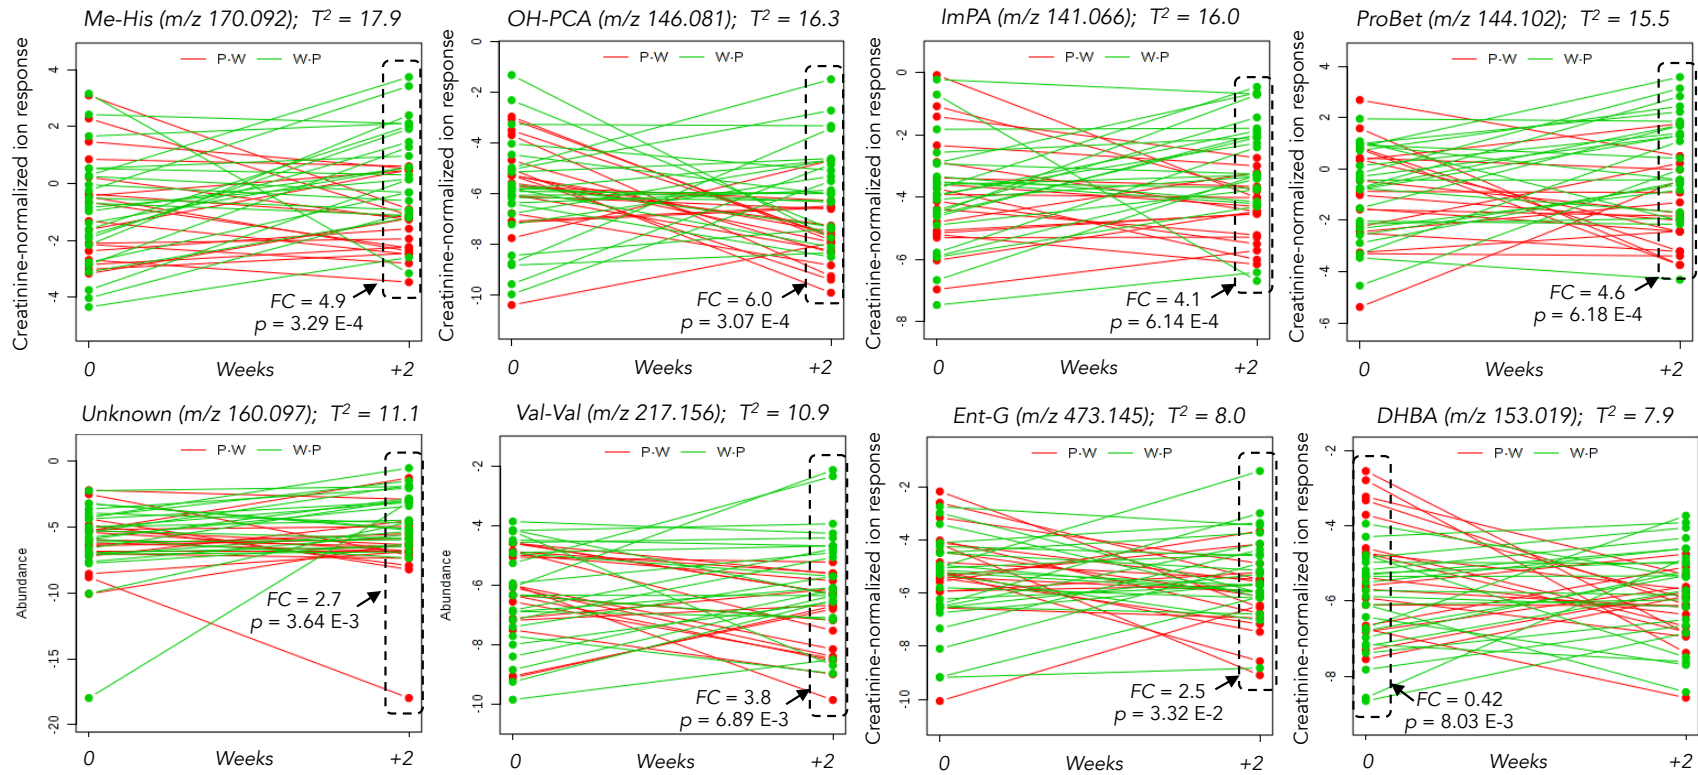

**Figure S12.** Top-ranked urinary metabolites associated with contrasting Prudent (W-P) and Western (P-W) diets from food provisions when using  $glog$ -transformed ion responses normalized to creatinine measured at baseline (habitual diet, 0) and following food provisions (2 weeks) for DIGEST participants ( $n=42$ ). Metabolic trajectories from time course studies were ranked based on Hotelling- $T^2$  values when using multivariate empirical Bayes analysis of variance (MEBA) together with student's  $t$ -test to confirm statistical significance ( $p < 0.05$ ) occurring after assigned diets as compared to baseline habitual diets ( $p > 0.05$ ) with the exception for DHBA.

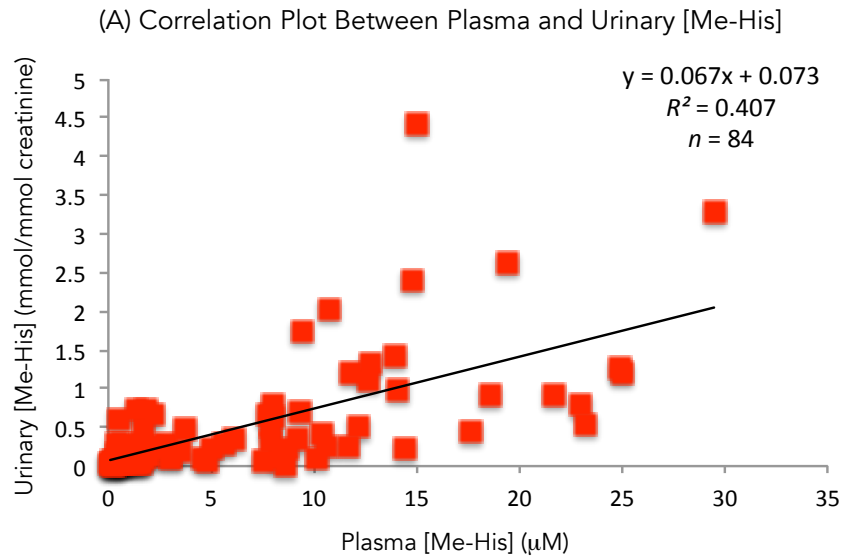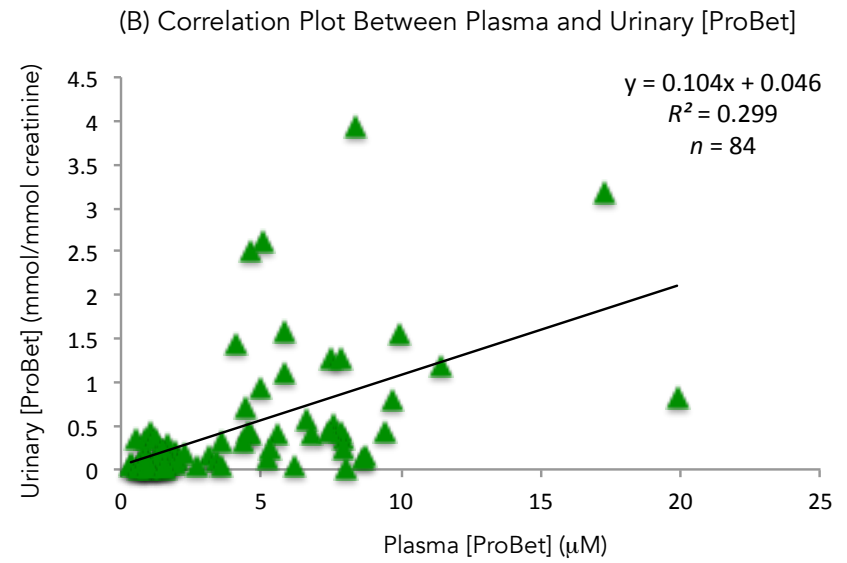

**Figure S13.** Linear correlation plots highlighting the strong association between fasting plasma concentrations of Me-His and ProBet and their creatinine-normalized concentrations measured independently from matching single-spot urine samples for DIGEST participants collected at baseline and then following 2 weeks of food provisions.

(A) Lead Plasma Biomarkers of Contrasting Diets from DIGEST

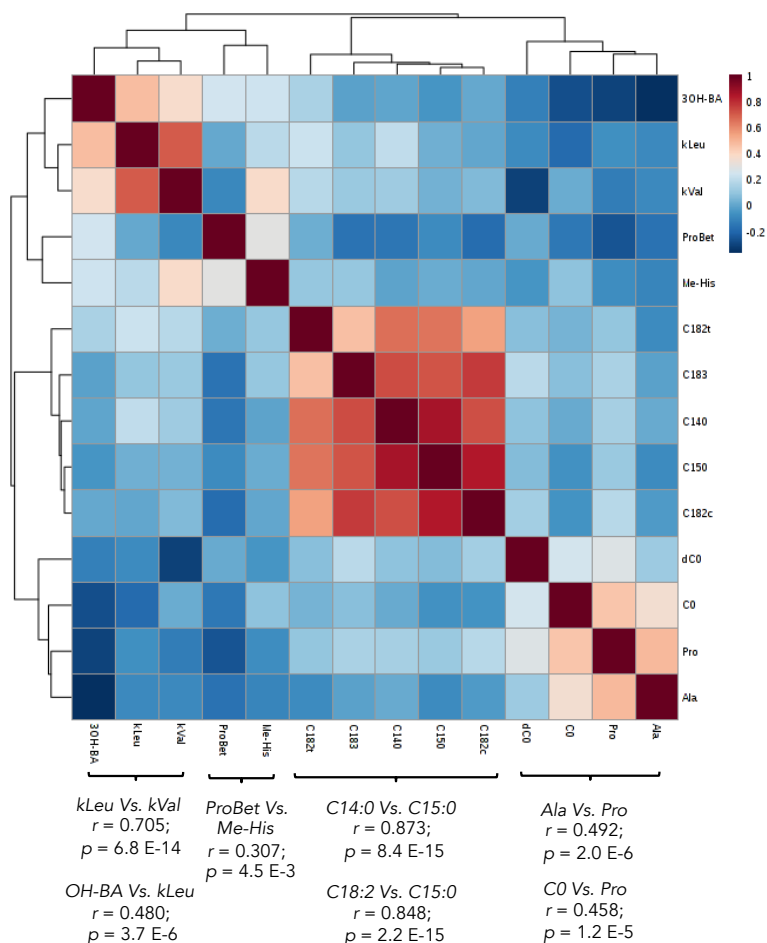

(B) Lead Urinary Biomarkers of Contrasting Diets from DIGEST

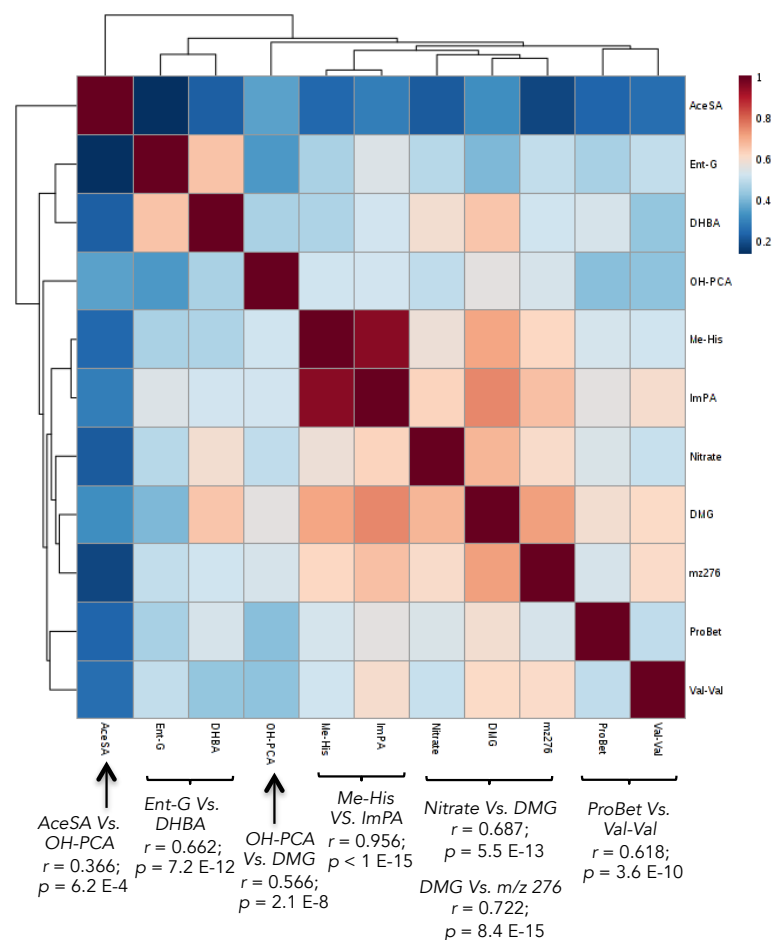

**Figure S14.** 2D heat maps and correlation matrices for top-ranked (A) plasma and (B) urinary metabolites associated with contrasting diets from food provisions when using a Pearson correlation analysis on *glog*-transformed data. Distinctive clusters of metabolite classes suggest common dietary sources and/or biochemical pathways for their regulation, such as circulating ketone bodies ( $kLeu$ ,  $kVal$ , 3-OH-BA), fatty acids ( $C14:0$ ,  $C15:0$ ,  $C18:2$ ,  $C18:3$ ) and amino acids/carnitines ( $CO$ ,  $Pro$ ,  $Ala$ ) in plasma, as well as plant-derived biotransformed phenols ( $Ent-G$ ,  $DHBA$ ) and imidazole metabolites ( $Me-His$ ,  $ImPA$ ) in urine. In many cases, urinary metabolites reflective of recent dietary patterns were broadly co-linear with other compounds (e.g.,  $OH-PCA$ ,  $Me-His$ ,  $ProBet$  and unknown ion,  $m/z$  276) or had modest correlations (e.g.,  $AceSA$ ) to other compounds overall.
